1 **Regulatory coiled-coil domains promote head-to-head assemblies of AAA+**  
2 **chaperones essential for tunable activity control**

3

4 Marta Carroni<sup>1,5,\*</sup>, Kamila B. Franke<sup>2,5</sup>, Michael Maurer<sup>2</sup>, Jasmin Jäger<sup>2</sup>, Ingo  
5 Hantke<sup>3</sup>, Felix Gloge<sup>4</sup>, Daniela Linder<sup>2</sup>, Sebastian Gremer<sup>2</sup>, Kürşad Turgay<sup>3</sup>, Bernd  
6 Bukau<sup>2,\*</sup> and Axel Mogk<sup>2,\*</sup>

7

8 <sup>1</sup> Swedish Cryo-EM Facility, Science for Life Laboratory Stockholm University,  
9 Box 1031, SE-171 21 Solna, Sweden

10 <sup>2</sup> Center for Molecular Biology of the University of Heidelberg (ZMBH) and  
11 German Cancer Research Center (DKFZ), DKFZ-ZMBH Alliance, Im Neuenheimer  
12 Feld 282, D-69120 Heidelberg, Germany

13 <sup>3</sup> Institute for Microbiology, Leibniz Universität Hannover, D-30167 Hannover,  
14 Germany

15 <sup>4</sup> Wyatt Technology Europe, Hochstrasse 12a, 56307 Dernbach, Germany

16 <sup>5</sup> these authors contributed equally to this work

17 \* corresponding authors

18 Correspondence:

19 [marta.carroni@scilifelab.se](mailto:marta.carroni@scilifelab.se)

20 [a.mogk@zmbh.uni-heidelberg.de](mailto:a.mogk@zmbh.uni-heidelberg.de)

21 [bukau@zmbh.uni-heidelberg.de](mailto:bukau@zmbh.uni-heidelberg.de)

## 22 **Abstract**

23 Ring-forming AAA+ chaperones exert ATP-fueled substrate unfolding by  
24 threading through a central pore. This activity is potentially harmful requiring  
25 mechanisms for tight repression and substrate-specific activation. The AAA+  
26 chaperone ClpC with the peptidase ClpP forms a bacterial protease essential to  
27 virulence and stress resistance. The adaptor MecA activates ClpC by targeting  
28 substrates and stimulating ClpC ATPase activity. We show how ClpC is repressed  
29 in its ground state by determining ClpC cryo-EM structures with and without  
30 MecA. ClpC forms large two-helical assemblies that associate via head-to-head  
31 contacts between coiled-coil middle domains (MDs). MecA converts this resting  
32 state to an active planar ring structure by binding to MD interaction sites. Loss of  
33 ClpC repression in MD mutants causes constitutive activation and severe cellular  
34 toxicity. These findings unravel an unexpected regulatory concept executed by  
35 coiled-coil MDs to tightly control AAA+ chaperone activity.

36

37

38

39

40

41

42

43

## 44 **Introduction**

45 AAA+ (ATPase associated with a variety of cellular activities) proteins control a  
46 multitude of essential cellular activities including DNA replication and  
47 recombination, protein transport and quality control, among many others <sup>1</sup>.  
48 AAA+ proteins convert the energy derived from ATP hydrolysis into a  
49 mechanical force to remodel bound substrates. ATP binding and hydrolysis is  
50 mediated by the conserved AAA domain, which also mediates AAA+ protein  
51 oligomerization typically into hexameric assemblies harboring a central channel.  
52 Substrate remodeling involves a threading activity into the central channel  
53 mediated by mobile loops that bind substrates and pull them upon nucleotide-  
54 induced motions <sup>2,3</sup>. AAA+ proteins gain functional diversity by extra domains  
55 that are either fused to or inserted into AAA domains. Extra domains enable  
56 targeting of specific substrates but they can also globally control AAA+ protein  
57 activity <sup>4</sup>.

58 AAA+ proteins are key players in protein quality control by targeting misfolded  
59 and aggregated proteins to degrading and refolding pathways. ClpB/Hsp104  
60 reactivates aggregated proteins in concert with a cognate Hsp70 system <sup>5,6</sup>.  
61 Other AAA+ proteins (e.g. ClpX, Rpt1-6) associate with peptidases (e.g. ClpP, 20S  
62 proteasome) to form AAA+ proteases, feeding protein substrates into associated  
63 proteolytic chambers for degradation <sup>7,8</sup>. The unfolding activity of AAA+ proteins  
64 can, however, also be deleterious to cells, in particular if linked to protein  
65 degradation, and therefore needs to be tightly controlled. Accordingly, loss of the  
66 control mechanisms of AAA+ protein activity in mutant proteins can lead to cell  
67 death <sup>9-11</sup>.

68 A high degree of substrate selectivity is equally important to ensure proper  
69 functioning of AAA+ proteins and to prevent deleterious activities. Substrate  
70 specificity is achieved by adaptor proteins, which bind selective substrates and  
71 target them to the AAA+ partner chaperone. Their functions can be additionally  
72 controlled by post-translational modifications <sup>12</sup>, counteracting anti-adaptors  
73 <sup>13,14</sup> or degradation <sup>15</sup>. Adaptor proteins can furthermore regulate the ATPase  
74 activity of AAA+ proteins and couple substrate delivery to ATPase activation <sup>9,16</sup>.

75 Activity control and adaptor action requires the ATPase activity to be repressed  
76 in the ground state, which is key to AAA+ chaperone mode of action. Repression  
77 can be achieved by regulatory coiled-coil domains inserted into an AAA module.  
78 In the ClpB/Hsp104 disaggregase a long coiled-coil middle domain (MD),  
79 consisting of two wings, is forming a repressing belt around the AAA ring to  
80 reduce ATPase activity <sup>17,18</sup>. Adjacent MDs bind to each other by head-to-tail  
81 interactions keeping the regulatory domains in place. ATPase repression is  
82 relieved by MD dissociation and binding to Hsp70 adaptors that prevent  
83 reassociation of MDs with the ClpB/Hsp104 ring <sup>9,19,20</sup>.

84 The bacterial AAA+ chaperone ClpC associates with the peptidase ClpP to form a  
85 central proteolytic machinery of Gram-positive bacteria. The ClpC-ClpP  
86 machinery acts in regulatory and general proteolysis, controlling multiple  
87 cellular pathways and differentiation processes and is crucial for bacterial stress  
88 resistance and virulence <sup>21-28</sup>. ClpC activity crucially relies on cooperation with  
89 adaptor proteins including MecA, that target specific substrates while  
90 concurrently stimulating ClpC ATPase activity <sup>15,16,21,29</sup>. MecA binds to N-terminal  
91 and middle domains of each ClpC subunit forming a separate layer on top of the

92 ClpC AAA ring <sup>30</sup>. How ClpC is kept inactive in adaptor absence, and how the  
93 adaptor activates the ATPase is largely unknown. Furthermore, ClpC harbors a  
94 coiled-coil MD consisting only of a single wing, as opposed to the two-wing MD of  
95 ClpB/Hsp104. A potential regulatory function of the ClpC MD has not been  
96 investigated, but its smaller size as compared to the ClpB/Hsp104 MD implies it  
97 must act differently if involved in ClpC activity control. Understanding ClpC  
98 regulation is particularly relevant as AAA+ protease machines including ClpC  
99 have attracted considerable attention as targets for antibacterial action in recent  
100 years <sup>31</sup>. Overruling AAA+ protease control by small molecules can lead to  
101 constitutive uncontrolled and toxic activation as best exemplified by  
102 acyldepsipeptide antibiotics of the ADEP class targeting the ClpP peptidase.  
103 ADEP-activated ClpP causes aberrant protein degradation and even allows for  
104 eradication of *Staphylococcus aureus* persister cells <sup>32-34</sup>. Understanding ClpC  
105 activity control therefore might open new avenues for antibiotics development.

106 Here, we report on an unexpected mode of AAA+ chaperone control involving  
107 transition between an inactive resting state and a functional hexamer as revealed  
108 by determining the cryoEM-structures of *S. aureus* ClpC in absence and presence  
109 of MecA. The ClpC resting state is composed of two helical ClpC assemblies  
110 stabilized by head-to-head MD interactions. MecA prevents MD interactions and  
111 thereby converts ClpC into a canonical and active hexamer.

112

113

114

## 115 Results

### 116 The ClpC M-domain represses ClpC activity

117 To study the function of the M-domain (MD) in ClpC activity control we first  
118 purified *S. aureus* ClpC/ClpP and demonstrated functionality by determining  
119 high-proteolytic activity in presence of the adaptor MecA (**Fig. 1**). Next, we  
120 created a series of ClpC MD variants by mutating conserved residues not  
121 involved in coiled-coil structure formation (**Supplementary Fig. 1A**).  
122 Additionally, we replaced the entire MD (N411-K457) by a di-glycine linker,  
123 allowing MD deletion without interfering with folding of the AAA-1 domain.  
124 Proteolytic activities of MD mutants were determined using Fluorescein-labeled  
125 casein (FITC-casein) as constitutively misfolded model substrate in absence and  
126 presence of MecA (**Fig. 1A/B, Supplementary Fig. 1B**). ClpC wild type (WT)  
127 together with ClpP exhibited only a low proteolytic activity in absence of MecA  
128 and FITC-casein degradation rates were 20-fold increased upon adaptor addition.  
129 In contrast, most MD mutants enabled for adaptor-independent FITC-casein  
130 proteolysis to varying degrees. ClpC-F436A, ClpC-R443A and ClpC-D444A  
131 showed highest activities with degradation rates close to those determined for  
132 ClpC WT plus MecA (**Fig. 1A/B**). Similarly, MD deletion strongly increased ClpC  
133 activity, indicating that the single point mutants reflect a loss of M-domain  
134 function. MecA presence still stimulated FITC-casein degradation by ClpC MD  
135 mutants except F436A and  $\Delta$ M, consistent with the crucial function of F436 in  
136 MecA binding (**Supplementary Fig. 1B**)<sup>30</sup>.

137 FITC-casein degradation by activated ClpC M-domain mutants (F436A,  $\Delta$ M)  
138 required ATP hydrolysis and was not observed in presence of ATP $\gamma$ S

139 **(Supplementary Fig. 1C)**. Complete degradation of FITC-casein by ClpC-F436A  
140 was confirmed by SDS-PAGE **(Supplementary Fig. 2)**, while ClpC WT required  
141 MecA to exhibit proteolytic activity. Here, we also noticed MecA autodegradation  
142 once FITC-casein was digested, in agreement with former findings for the *B.*  
143 *subtilis* ClpC/MecA system<sup>15,16,29</sup>. We infer that ClpC MD mutants exhibit high,  
144 adaptor-independent proteolytic activities, qualifying the M-domain as a  
145 negative regulatory element.

146 To further investigate a repressing function of the ClpC MD we determined GFP-  
147 SsrA degradation activities of selected ClpC MD mutants exhibiting highest FITC-  
148 casein degradation activities (F436A, R443A,  $\Delta$ M). GFP-SsrA harbors the 11-  
149 meric SsrA tag, which is recognized by AAA+ chaperones pore sites<sup>35-37</sup>. GFP-  
150 SsrA degradation requires application of high unfolding force in contrast to FITC-  
151 casein, which is constitutively unfolded. ClpC WT/ClpP efficiently degraded GFP-  
152 SsrA in a MecA-dependent manner **(Fig. 1C)**. Surprisingly, ClpC MD mutants did  
153 hardly exhibit autonomous degradation of GFP-SsrA in contrast to FITC-casein.  
154 ClpC-R443A was partially stimulated upon MecA addition demonstrating that  
155 the M-domain mutant can process GFP-SsrA in principle **(Supplementary Fig.**  
156 **3A)**. We speculated that differences in GFP-SsrA and FITC-casein binding modes  
157 might be the cause of the different degradation activities of ClpC MD mutants.  
158 Hsp100 N-domains contribute to casein binding<sup>38,39</sup> while their position on top  
159 of the AAA-1 ring and central pore site could impede GFP-SsrA binding. We  
160 therefore determined GFP-SsrA degradation activities of N-domain deleted  $\Delta$ N-  
161 ClpC and respective MD mutants **(Fig. 1D)**. GFP-SsrA remained stable in  
162 presence of  $\Delta$ N-ClpC/ClpP, however, the substrate was rapidly degraded by  $\Delta$ N-

163 ClpC-F436A,  $\Delta$ N-ClpC-R443A and  $\Delta$ N-ClpC- $\Delta$ M (+ ClpP) and degradation rates  
164 were identical to those determined for ClpC WT/ClpP with MecA (**Fig. 1E**). We  
165 did not test for GFP-SsrA degradation by  $\Delta$ N-ClpC/ClpP in presence of MecA, as  
166 the N-domain is essential for MecA binding <sup>30,40,41</sup>. GFP-SsrA degradation by  
167 activated  $\Delta$ N-ClpC M-domain mutants relied on ATP hydrolysis and remained  
168 specific as the substrate variant GFP-SsrA-DD was not degraded  
169 (**Supplementary Fig. 3B**). Here, the two C-terminal alanine residues of the SsrA  
170 tag are replaced by aspartate residues, obstructing binding to the AAA+  
171 chaperone pore site <sup>42</sup>. This documents that MD mutations boost ClpC unfolding  
172 activity in absence of adaptor without altering general substrate specificity.

173

#### 174 **ClpC M-domain mutants exhibit increased basal ATPase activities**

175 *B. subtilis* ClpC activation by adaptors involves strong stimulation of ClpC ATPase  
176 activity <sup>21,29,41</sup>, which we confirm here for *S. aureus* ClpC and MecA (**Fig. 2A**). ClpC  
177 WT exhibits a very low basal ATPase activity (0.4 ATP/min/monomer),  
178 rationalizing its poor standalone degradation activity. Notably, all activated MD  
179 mutants (F436A, R443A,  $\Delta$ M) exhibited strongly increased basal ATPase  
180 activities (3.3 – 5.4 ATP/min/monomer) that were further increased by  
181 substrate casein (1.64 – 2.47-fold stimulation) in contrast to ClpC WT (**Fig.**  
182 **2A/B**). Casein-stimulated ClpC MD mutants reached 33% of total ATPase activity  
183 determined for MecA-activated ClpC WT. N-domain deletion also increased basal  
184 ATPase activity of  $\Delta$ N-ClpC. Combining  $\Delta$ N-ClpC with M-domain mutants had an  
185 additive stimulatory effect on ATPase activities, suggesting that the underlying  
186 mechanisms are distinct from one another (**Fig. 2A**). We infer increased basal



187 ATPase activities of ClpC MD mutants can explain adaptor-independent  
188 substrate degradation. However, ATPase activation alone is not sufficient to  
189 explain ClpC activation as  $\Delta$ N-ClpC did not allow degradation of GFP-SsrA despite  
190 having increased basal ATPase activity. This indicates specific consequences of  
191 MD mutations on ClpC conformation and activity.

192

### 193 **Head-to-head interactions of M-domains mediate formation of an inactive** 194 **ClpC resting state**

195 To understand the structural basis underlying the control of ClpC activity by the  
196 MD, we determined the cryo-EM structures of *S. aureus* ClpC with and without its  
197 activator MecA in the presence of ATP $\gamma$ S. The structure of ClpC on its own was  
198 solved at 8.4 Å resolution using ~ 90,000 collected particles (**Supplementary**  
199 **Fig. 4A**). Surprisingly, raw images and subsequent 2D classification revealed  
200 immediately that ClpC assumes a conformation different from the canonical  
201 hexameric arrangement of AAA+ proteins (**Supplementary Fig. 4B/C**). Attempts  
202 of 3D classification and refinement using the existing ClpC-MecA structures<sup>30,43</sup>  
203 failed to give a refined map, indicating that on its own, ClpC assumes a  
204 substantially different conformation. Indeed, reconstructions revealed that ClpC  
205 without MecA assembles into an almost decameric assembly made of two open  
206 spirals that interact via head-to-head contacts mainly mediated by the MDs (**Fig.**  
207 **3A/B, Supplementary Fig. 4D**). Continuous spiraling of AAA+ proteins is often  
208 observed in X-ray structures<sup>17,18,44,45</sup> and ClpC half spirals are similar to these  
209 crystal packings. However, the ClpC double spiral is completely open on one side  
210 (**Fig. 3A/B, Supplementary Movie1**) giving a cradle-like molecule with the

211 peripheral subunits more mobile than the core ones, as shown by lower local  
212 resolution (**Supplementary Fig 4E**). Additionally, high-threshold noise on the  
213 open part of the spiral indicates higher dynamics of this region, suggesting  
214 exchange of subunits. Accordingly, for peripheral ClpC subunits there is not  
215 sufficient density to account for all ClpC domains. The overall subdomain  
216 organization within the ClpC protomer is similar to that of the ClpC-MecA crystal  
217 structures, however domain positions and interactions are different. The AAA+  
218 domains are staggered with a rise of  $\sim 20$  Å per subunit (**Fig. 3B**). N-domains  
219 domains are packed between MDs and are displaced so that they lie on top of the  
220 adjacent small AAA1 subdomain (**Fig. 3B/C**). The MDs coiled-coils constitute the  
221 backbone of the spiral and mediate the spiral head-to-head contacts, which  
222 involve residues F436, R443 and D444 providing a structural rationale for the  
223 activated states of respective MD mutants (**Fig. 3D**).

224 We envision the helical ClpC assembly as a dynamic inactive resting state, which  
225 will interfere with substrate binding, association of the ClpP peptidase and  
226 interaction with adaptor proteins. Furthermore, the spiral arrangement of the  
227 AAA+ domains results in a displacement of most trans-acting arginine-fingers  
228 away from the adjacent nucleotide pocket (**Supplementary Fig. 4F**), thereby  
229 affecting ATP hydrolysis and explaining the low ATPase activity of ClpC WT.

230 The *S. aureus* ClpC-MecA cryo-EM map was reconstructed at 10 Å resolution with  
231  $\sim 26,000$  particles, (**Supplementary Fig. 5A-D**) and shows the classical hexameric  
232 assembly previously described<sup>30,43</sup>, with MecA interacting with both the MD and  
233 the N-domain of ClpC. Additional extra density caps the hexamer and accounts  
234 for the N-terminal domain of MecA, whose structure is unknown. Automatic

235 flexible fitting revealed that the hexamer is slightly asymmetric with 5 out of 6  
236 subunits more defined (**Fig. 3E**), similar to the AAA+ protein Vps4<sup>46</sup>. From the  
237 resting to the MecA-bound state the N-domains undergo a 45° rotation that  
238 repositions the MecA-binding loop region from being blocked by the MD of the  
239 neighbouring subunit to be available and engaged in MecA binding  
240 (**Supplementary Fig. 5 E/F**). Additionally, binding of MecA to MDs breaks head-  
241 to-head MD contacts and is therefore expected to prevent formation of the ClpC  
242 resting state.

243 Taken together, our structures of ClpC alone or in complex with MecA show a  
244 dramatic reorganization from a helical resting state to a planar canonical AAA+  
245 hexamer, explaining ClpC activation by the adaptor MecA. Intermolecular head-  
246 to-head contacts of MDs form the backbone of the ClpC resting state, qualifying  
247 the MD as crucial negative regulatory element consistent with MD mutant  
248 characterization.

249

### 250 **MecA abrogates head-to-head M-domain interactions**

251 To demonstrate direct head-to-head contacts of ClpC MDs we introduced  
252 cysteine residues at the tip of the MD (E435C, E437C) to probe for site-specific  
253 disulfide crosslinking. These mutations were introduced into ClpC-C311T to  
254 avoid interference of the endogenous Cys311 residue. ClpC-C311T/E435C and  
255 ClpC-C311T/E437C were active in MecA-dependent protein degradation under  
256 reducing conditions (**Supplementary Fig. 6A**). Formation of crosslink products  
257 under oxidizing conditions that were fully reverted by addition of reducing agent  
258 was observed for ClpC-C311T/E437C but not for ClpC-C311T/E435C and the

259 ClpC-C311T control (**Supplementary Fig. 6B**). This documents specificity of  
260 disulfide crosslinking and agrees well with the ClpC resting state model, showing  
261 E437 residues of two interacting M-domains are facing one another while E435  
262 residues are oriented in opposite directions (**Supplementary Fig. 6B**). E437C  
263 disulfide crosslinking was most efficient in absence of nucleotide or presence of  
264 ADP and ATP, and less efficient in presence of ATP $\gamma$ S (**Supplementary Fig. 6C**).  
265 Importantly, ClpC-E437C crosslinking in presence of MecA was strongly reduced  
266 (**Fig. 4A**), consistent with MecA binding to MDs preventing head-to-head MD  
267 interactions. Similarly, crosslinking efficiency was reduced for ClpC-  
268 F436A/E437C, indicating a crucial contribution of F436 to intermolecular MD  
269 contacts (**Fig. 4B**), consistent with the ClpC WT cryo-EM structure.

270

## 271 **Obstructing head-to-head M-domain contacts allows for ClpC hexamer** 272 **formation**

273 To provide biochemical support for the formation of a large, inactive ClpC resting  
274 state we employed chemical crosslinking and size exclusion chromatography. We  
275 used the ATPase-deficient ClpC-E280A/E618A variant (referred to as ClpC-DWB),  
276 harboring mutated Walker B motifs in both AAA+ domains allowing for ATP  
277 binding but not hydrolysis, facilitating analysis of adaptor or substrate impact on  
278 ClpC assembly. We first determined sizes of ClpC assemblies by glutaraldehyde  
279 crosslinking (**Fig. 5A**). ClpC-DWB was crosslinked to very large assemblies that  
280 were just entering the separating gel in SDS-PAGE in absence and presence of  
281 ATP (**Fig. 5A**). Addition of MecA allowed for formation of a smaller high  
282 molecular weight complex similar in size to crosslinked ClpB hexamers that were

283 used as reference (**Fig. 5A**). Presence of MecA in the crosslinked ClpC-DWB  
284 complexes was confirmed by western-blot analysis (**Supplementary Fig. 7**).  
285 ClpC-F436A-DWB stayed monomeric in absence of nucleotide, indicating that  
286 large assemblies observed for ClpC-DWB rely entirely on MD contacts (**Fig. 5A**).  
287 ClpC-F436A-DWB crosslinking in presence of ATP caused formation of defined  
288 ClpC-F436A-DWB complexes that were similar in size to crosslinked ClpB  
289 hexamers. These findings confirm the predicted critical contribution of the MD to  
290 formation of a large resting state and the role of MecA in converting this  
291 assembly into a functional hexamer.

292 We next analyzed sizes of ClpC complexes by size exclusion chromatography (**Fig.**  
293 **5B, Supplementary Fig. 8A**). In absence of ATP ClpC-DWB showed a broad  
294 elution profile, suggesting formation of variable assemblies ranging from  
295 monomers to hexamers. ATP addition caused formation of larger ClpC  
296 assemblies that eluted prior to ClpB hexamers and a 670 kDa standard protein,  
297 suggesting formation of ClpC complexes larger than hexamers (**Fig. 5B,**  
298 **Supplementary Fig. 8A**). This was confirmed by static light scattering (SLS)  
299 measurements, revealing a molecular mass of  $\approx 956$  kDa corresponding to a  
300 decameric complex, consistent with cryoEM analysis (**Supplementary Fig. 8B**).  
301 Presence of MecA sharpened the ClpC elution profile and shifted ClpC-DWB  
302 fractions to later elution volumes right after the 670 kDa standard protein and  
303 now overlapping with ClpB hexamers (**Fig. 5B, Supplementary Fig. 8A**).  
304 Quantification of co-eluting MecA suggests the formation of a 1:1 ClpC:MecA  
305 complex, consistent with the binding stoichiometry determined for *B. subtilis*  
306 ClpC/MecA complexes and mass determination by SLS (767 kDa)

307 **(Supplementary Fig. 8B)**<sup>30,40</sup>. This indicates that MecA binding shifts ClpC from  
308 a large, non-hexameric assembly to a ClpC<sub>6</sub>/MecA<sub>6</sub> complex. We next analyzed  
309 the elution profile of ClpC-DWB-F436A. In absence of ATP the MD mutant eluted  
310 as defined species right at the elution volume of a 158 kDa standard protein  
311 suggesting formation of monomers/dimers **(Fig. 5B)**. This indicates that the  
312 formation of larger assemblies noticed for ClpC WT (- ATP) depends on the M-  
313 domain, consistent with results from glutaraldehyde crosslinking **(Fig. 5A)**  
314 Unexpectedly, ClpC-DWB-F436A showed a broad elution profile upon ATP  
315 addition. While the ClpC-DWB-F436A peak fraction eluted right after the 670  
316 kDa standard, larger assemblies at earlier elution volumes were also present. We  
317 speculated that activated ClpC MD mutants might be capable of recognizing  
318 themselves as substrate resulting in formation of larger complexes and  
319 explaining the elution profile. Indeed, we observed autodegradation of ClpC-  
320 F436A, ClpC-R443A and ClpC-ΔM but not ClpC WT in presence of ClpP  
321 **(Supplementary Fig. 9)**. To prevent self-recognition of ClpC-DWB-F436A we  
322 repeated the size exclusion analysis in presence of substrate casein excess **(Fig.**  
323 **5B)**. Presence of casein sharpened the ClpC-DWB-F436A elution profile that was  
324 comparable to ClpC-DWB/MecA complexes and distinct from ClpC-DWB,  
325 suggesting hexamer formation, which was confirmed by mass determination by  
326 SLS (587 kDa). In contrast, casein addition did not cause formation of smaller  
327 ClpC-DWB complexes **(Supplementary Fig. 8B)**. To further prove ClpC-F436A  
328 hexamer formation, a small cryo-EM dataset of ClpC-F436A with casein and  
329 ATPγS was collected and analyzed via 2D classification. Classes indicate that the  
330 ClpC-F436A assembles in an hexamer similar to ClpC WT with MecA **(Fig. 5C)**.

331 Together our findings demonstrate that ClpC-DWB forms large, non-hexameric  
332 assemblies in a MD dependent manner, supporting the derived ClpC WT cryo-EM  
333 structure. This large ClpC-DWB assembly should neither allow for efficient  
334 substrate binding nor association with the ClpP peptidase. This prediction was  
335 confirmed by size exclusion chromatography showing poor interaction with ClpP  
336 and negligible binding to substrate FITC-casein (**Fig. 5D, Supplementary Fig.**  
337 **8C**). In contrast, efficient binding to FITC-casein and ClpP was observed upon  
338 addition of MecA and for ClpC-DWB-F436A (- MecA) (**Fig. 5d, Supplementary**  
339 **Fig. 8C**). These findings were further confirmed by monitoring FITC-casein  
340 binding by anisotropy measurements (**Supplementary Fig. 8D/E**).

341

#### 342 **M-domain activity control of ClpC is crucial for cellular viability**

343 ClpC MD mutants allow for adaptor-independent and thus constitutive and  
344 uncontrolled ClpC activity. We wondered whether this loss of ClpC activity  
345 control has physiological consequences and co-expressed *S. aureus* ClpC WT,  $\Delta$ N-  
346 ClpC and respective F436A mutants from an IPTG-regulated promoter together  
347 with *S. aureus* ClpP in *E. coli* cells. This strategy allowed us to only monitor  
348 potential toxic effects of ClpC M-domain mutants without interference by loss of  
349 endogenous functions of ClpC/MecA in *S. aureus* cells. Levels of ClpC variants  
350 were similar after 1 h of IPTG-induced protein production (**Supplementary Fig.**  
351 **10A**). In case of ClpC-F436A we noticed accumulation of a degradation product  
352 upon ClpP coexpression, as also observed *in vitro* (**Supplementary Fig. 9**),  
353 suggesting autoprocessing. We observed strong toxicity upon expression of  $\Delta$ N-  
354 ClpC-F436A at all temperatures tested while ClpC-F436A expression became

355 lethal at 37°C and 40°C (**Fig. 6A**). Toxicity of ClpC MD mutants was much higher  
356 as compared to ClpC-WT and  $\Delta$ N-ClpC, indicating an essential cellular need for  
357 ClpC repression by MDs. Furthermore, toxicity of ClpC MD mutants was  
358 dependent on coexpression of *S. aureus* ClpP, suggesting that uncontrolled  
359 protein degradation caused by constitutively activation results in cell death  
360 (**Supplementary Fig. 10B**).

361 To further corroborate our findings we explored the physiological consequences  
362 of the same ClpC MD mutation in *B. subtilis*. Here, we deleted the chromosomal  
363 copy of the *clpC* gene (*clpC::tet*) and re-integrated either *clpC wt* or *clpC-F436A* at  
364 the *amyE*-locus under IPTG control. Expression of *clpC-F436A* but not *clpC wt* in  
365 presence of 100  $\mu$ M IPTG was highly toxic at all temperatures (30°C – 50°C) (**Fig.**  
366 **6B**). Levels of ClpC-wt and ClpC-F436A produced after IPTG addition in cells  
367 cultured in liquid medium were comparable, excluding differences in protein  
368 levels as reason for toxicity (**Supplementary Fig. 10C**). Importantly, growth of  
369 *clpC::tet* cells was not impaired, demonstrating that toxicity of ClpC-F436A  
370 reflects a gain-of-function phenotype and is not caused by loss of adaptor  
371 interaction (**Fig. 6B**). Together these findings demonstrate an essential role of  
372 MD mediated activity control for cellular viability.

373 The Hsp100 family members ClpE and ClpL harbor a coiled-coil MD that is  
374 similar in size to the ClpC MD and also displays some sequence homology.  
375 Notably, F436 and R443, identified here as key MD residues in ClpC activity  
376 control, are largely conserved in ClpE and ClpL M-domains (**Fig. 6C**). This  
377 suggests that the role of M-domains as crucial negative regulators of Hsp100  
378 activity is conserved in other family members. To test for a conserved regulatory



379 function we generated the *B. subtilis* ClpE-Y344A MD mutant corresponding to  
380 ClpC-F436A. *clpE wt* and *clpE-Y344A* copies were integrated at the *amyE*-locus in  
381 *B. subtilis* wild type cells under control of an IPTG-regulatable promoter. *B.*  
382 *subtilis* cells do hardly express endogenous *clpE* at non-stress conditions <sup>47,48</sup>  
383 thereby allowing mutant analysis without interference of ClpE WT copies.  
384 Expression of *clpE-Y344A* but not *clpE wt* in presence of 100  $\mu$ M IPTG was highly  
385 toxic to *B. subtilis* cells at all temperatures tested (30°C – 50°C) (**Fig. 6D**). ClpE  
386 WT and ClpE-Y344A were produced to similar levels underscoring that toxicity is  
387 caused by deregulation of the ClpE MD mutant (**Supplementary Fig. 10D**). This  
388 suggests that ClpE MDs are also essential to downregulate ClpE activity  
389 preventing cellular toxicity.

390

## 391 **Discussion**

392 In the presented work we established a new mechanism of activity control of  
393 ClpC, a central AAA+ chaperone widely distributed among Gram-positive  
394 bacteria. We show that coiled-coil MDs control ClpC activity in a unique manner  
395 by sequestering ClpC molecules in an inactive resting state.

396 Our findings extend the role of coiled-coil MDs as regulatory devices controlling  
397 AAA+ protein activity. MDs of the ClpB/Hsp104 disaggregases function as  
398 molecular toggles, which are crucial for AAA+ protein repression in the ground  
399 state and activation by an Hsp70 partner chaperone <sup>9,18-20,49</sup> (**Fig. 7**). Repression  
400 by ClpB/Hsp104 MDs relies on formation of a repressing belt around a canonical  
401 AAA+ ring by interacting with AAA-1 domains and neighboring MDs.

402 Intermolecular head-to-tail contacts between long MDs (~ 120 residues forming  
403 two wings) are crucial to keep MDs in a horizontal, repressing conformation <sup>17</sup>  
404 (**Fig. 7**). Hsp70 binding to the tip of one wing breaks MD interactions and leads  
405 to ClpB activation.

406 ClpC MDs cannot function in the same manner due to their reduced size (~ 50  
407 residues forming a single wing), which is too short to span the distance between  
408 neighboring subunits in a hexameric assembly. Instead, ClpC MDs form  
409 intermolecular head-to-head contacts allowing docking of two layers of ClpC  
410 molecules arranged in a helical conformation (**Fig. 7**). We define this large ClpC  
411 assembly as inactive resting state, as it strongly restricts binding of substrates,  
412 ClpP and adaptor proteins and does not allow for efficient ATP hydrolysis. The  
413 interaction surface of MDs is limited (50 Å<sup>2</sup>) suggesting that the ClpC storage  
414 state is not stable but dynamic, in agreement with our structural and biochemical  
415 analysis. This will open the route for ClpC activation upon dissociation of ClpC  
416 molecules from the resting structure, liberating MDs and N-domains for binding  
417 to activating MecA or other adaptors. Additionally, MecA might bind to  
418 peripheral subunits of the ClpC storage state causing their displacement. ClpC  
419 MDs thereby function as molecular switches, similar to ClpB/Hsp104 MDs,  
420 ensuring repression in the ground state and allowing for activation in presence  
421 of substrate recruiting adaptors (**Fig. 7**). This dual activity is best illustrated for  
422 MD residue F436 located at the tip of the coiled-coil structure. F436 is essential  
423 for both, intermolecular MD interaction and MecA binding (**Fig. 7**). The N-  
424 terminal domain appears to play an additional role in this switch of

425 conformations, by going from a more hidden position in between MDs in the  
426 resting state to a more exposed one, available to MecA or other adaptors.

427 Our newly derived model of *S. aureus* ClpC activity control differs from a former  
428 one, showing that *B. subtilis* ClpC is monomeric and requires MecA for hexamer  
429 formation <sup>40</sup>. We realize that former ClpC analysis was performed in presence of  
430 high salt concentrations (300 mM NaCl), which likely interfere with MD head-to-  
431 head contacts involving charged residues (R443, D444). A regulatory model  
432 involving only monomer-hexamer transitions cannot explain activation and  
433 severe cellular toxicity of ClpC MD mutants shown here in *E. coli* and *B. subtilis*  
434 cells. However, we suggest that the oligomerization dependence of ClpC on MecA  
435 at high salt concentrations might represent a fail-safe system ensuring adaptor-  
436 dependent ClpC activation under conditions that do not allow for resting state  
437 formation (e.g. salt stress).

438 Once formed the hexameric ClpC<sub>6</sub>/MecA<sub>6</sub> complex is stable and does not  
439 dissociate spontaneously, raising the question how ClpC activation is turned off.  
440 Adaptor proteins are targeting themselves for autodegradation by ClpC/ClpP if  
441 substrates are no longer available <sup>15,29,50</sup>. This mechanism couples substrate  
442 availability with ClpC activation and ensures fast ClpC inactivation in absence of  
443 substrate by causing dissociation of ClpC hexamers into monomers that are  
444 subsequently sequestered in the resting state. Notably, other chaperone  
445 machineries including the Hsp70 member BIP <sup>51</sup> and the AAA+ protein Rca <sup>52</sup>  
446 also form large, inactive resting states that are converted into active species  
447 depending on substrate availability. Sequestration of chaperones therefore

448 seems a more widespread activity to tune their activities according to the  
449 physiological need.

450 Constitutively activated ClpC MD mutants exert strong toxicity in *E. coli* and *B.*  
451 *subtilis* cells, demonstrating an essential physiological need to tightly control  
452 ClpC function. We assume that overhasty protein degradation by deregulated  
453 ClpC/ClpP complexes of e.g. newly synthesized proteins or secretory proteins,  
454 which did not yet reach their native structures or cellular compartment, leads to  
455 cell death.

456 Homologous MDs are present in the AAA+ protein family members ClpE and  
457 ClpL and key residues driving formation of the ClpC resting state are  
458 evolutionary conserved. We show that mutating a key regulatory MD residue of  
459 ClpE also causes cellular toxicity, strongly suggesting that the repressing mode of  
460 MDs established here for ClpC is also operational in ClpE and ClpL and thus is a  
461 more general mechanism for controlling bacterial AAA+ chaperone systems.

462 Severe toxicity of ClpC and ClpE MD mutants qualifies these AAA+ chaperones as  
463 targets for antimicrobials. In fact, the deregulation of bacterial proteases  
464 represents a novel antibacterial strategy<sup>53,54</sup>. Notably, the *M. tuberculosis* ClpC N-  
465 terminal domain was recently identified as target of cyclic peptides with  
466 antibacterial activities<sup>55-57</sup>. Although the mode of these drugs and their effects  
467 on ClpC function are not understood it is likely that they interfere with ClpC  
468 activity control. Our findings presented here open a new route for toxic ClpC  
469 deregulation by identifying MDs as crucial regulatory elements and thus drug  
470 targets and offering a promising approach to attack multi-drug resistant bacteria.

## 471 **Materials and Methods**

### 472 **Strains, plasmids and proteins**

473 *E. coli* strains used were derivatives of MC4100, XL1-blue or DH5 $\alpha$ . ClpC, MecA,  
474 ClpP were amplified by PCR, inserted into pDS56 and verified by sequencing.  
475 Mutant derivatives of ClpC were generated by PCR mutagenesis and standard  
476 cloning techniques in pDS56 and were verified by sequencing. Transformation  
477 into *B. subtilis* 168 was performed by standard methods<sup>58</sup>. AmyE insertion in  
478 *B. subtilis* was checked by plating on agar containing 0.4 % starch (w/v)  
479 additionally to appropriate antibiotics, screening for successful loss of  $\alpha$ -amylase  
480 by staining starch with Lugol's iodine.

481 ClpC and variants, MecA and ClpP were purified after overproduction from *E. coli*  
482  $\Delta clpB::kan$  cells. GFP-SsrA was purified after overproduction from *E. coli*  $\Delta clpX$   
483  $\Delta clpP$  cells. All proteins were purified using Ni-IDA (Macherey-Nagel) and size  
484 exclusion chromatography (Superdex S200, GE Healthcare) following standard  
485 protocols. Pyruvate kinase of rabbit muscle, casein and FITC-casein were  
486 purchased from Sigma. Protein concentrations were determined with the Bio-  
487 Rad Bradford assay.

488

### 489 **Biochemical assays**

490 *Size exclusion chromatography and multi-angle light scattering.*

491 Complex formation of ClpC (10  $\mu$ M) was monitored by size exclusion  
492 chromatography (SEC, Superose 6 10/300 GL, GE Healthcare). MecA (20  $\mu$ M),

493 ClpP (20  $\mu$ M), casein (16.66  $\mu$ M) and FITC-casein (2.5  $\mu$ M) were added as  
494 indicated. Experiments were run at 25°C in buffer A (50 mM Tris pH 7.5, 25 mM  
495 KCl, 20 mM MgCl<sub>2</sub>) supplemented with 2 mM ATP. Samples were prepared  
496 freshly and incubated for 5 minutes with 2 mM ATP prior to injection. Fractions  
497 were collected in 96-well plates, aliquots taken and subjected to SDS-PAGE. Gels  
498 were stained using SYPRO® Ruby Protein Gel Stain (ThermoFisher) following  
499 manufacturer instructions. Band intensities were quantified using ImageJ. To  
500 monitor the binding of ClpC to FITC-Casein, the collected fractions were analyzed  
501 for FITC fluorescence using FLUOstar Omega (BMG Labtech) with standard FITC  
502 filter sets. Chromatography was performed in three independent experiments  
503 each and representative results are provided.

504 Complex formation analyzed by SEC was additionally followed by online multi-  
505 angle light scattering (MALS) using an Agilent 1260 Infinity II HPLC system  
506 connected in series with a 3-angle multi-angle light scattering detector  
507 (miniDAWN TREOS II, Wyatt Technology, collection rate of 2 data points per  
508 second) and an additional online differential refractive index detector (Optilab T-  
509 rEX, Wyatt Technology) for concentration determination. Data analysis was  
510 performed using ASTRA 7.1 (Wyatt Technology). Samples were additionally  
511 filtered through a 0.2  $\mu$ m low-protein binding syringe filter (Millex-GV, Merck  
512 Millipore Ltd.) before application to the SEC-column.

### 513 *ATPase activity*

514 The ATPase rate of ClpC and mutants was determined using a coupled-  
515 colorimetric assay as described before<sup>9</sup>. The assay was carried out at 2 mM ATP

516 in buffer A including 2 mM DTT at 30°C using a FLUOstar Omega plate reader.  
517 The final protein concentrations were as follows: ClpC (1 μM), MecA (1.5 μM),  
518 casein (10 μM). In presence of casein MecA concentrations were reduced to 0.2  
519 μM. The raw data was analyzed using the following equation:

520

$$\text{ATPase rate} = \frac{1}{\epsilon(\text{NADH}) \cdot c(\text{ATPase}) \cdot d} \cdot \frac{d(A_{340 \text{ nm}})}{dt}$$

521

522 **ε(NADH):** Extinction coefficient at 340 nm for NADH (M<sup>-1</sup> cm<sup>-1</sup>)

523 **c(ATPase):** Concentration of ATPase (M)

524 **d:** path length (cm)

525 **d(A<sub>340 nm</sub>)/dt:** derivative of the linear graph (slope)

526

527 ATPase rates were calculated from the linear decrease of A<sub>340</sub> in at least three  
528 independent experiments and standard deviations were calculated.

529

530 *Degradation assays*

531 FITC-casein degradation was analyzed using a CLARIOstar plate reader, in black  
532 384 well plates (Corning, NBS coated, flat bottom), in buffer A with 2 mM DTT.  
533 The final protein concentrations were as follows 0.3 μM FITC-casein, 1 μM ClpC,  
534 1.5 μM MecA, 2 μM ClpP. The assay was carried out in the presence of an ATP  
535 regenerating system (0.02 mg/mL PK, 3 mM PEP pH 7.5) and 2 mM ATP. For  
536 measuring the decrease of FITC-casein fluorescence the filters 483-14 nm (ex)  
537 and 530-30 nm (em) were used. For data processing the background in the  
538 absence of ClpC was subtracted and the initial fluorescence intensities were set

539 to 1. FITC-casein degradation rates were determined by the initial slopes of the  
540 fluorescence signal increase in at least three independent experiments and  
541 standard deviations were calculated. Alternatively degradation of FITC-casein (5  
542  $\mu\text{M}$ ) was monitored by SDS-PAGE followed by Coomassie staining.

543 Degradation of GFP-SsrA (0.2  $\mu\text{M}$ ) was performed in buffer A with 2 mM DTT  
544 using the following protein concentrations: 1  $\mu\text{M}$  ClpC, 1.5  $\mu\text{M}$  MecA, 2  $\mu\text{M}$  ClpP.  
545 Reactions were started by addition of an ATP regenerating system (0.02 mg/mL  
546 PK, 3 mM PEP pH 7.5) and 2 mM ATP. GFP fluorescence was monitored with a  
547 LS55 spectrofluorimeter (Perkin Elmer) using 400 and 510 nm as excitation and  
548 emission wavelengths. Initial GFP-SsrA fluorescence intensity was set as 100 and  
549 degradation rates were determined by the initial slopes of fluorescence signal  
550 decrease in at least three independent experiments and standard deviations  
551 were calculated.

552

### 553 *Crosslinking*

554 Glutaraldehyde crosslinking was performed by incubating 1  $\mu\text{M}$  ClpC or ClpB  
555 buffer B (50 mM HEPES, 25 mM KCL, 10 mM  $\text{MgCl}_2$ , 2 mM DTT, pH 7.5) in  
556 absence or presence of 2 mM ATP/ATP $\gamma$ S and 3  $\mu\text{M}$  MecA at 25°C for 15 minutes.  
557 Crosslinking was started by adding Glutaraldehyde (Sigma) to a final  
558 concentration of 0.1%. Aliquots were taken at indicated time points and  
559 crosslinking was quenched by adding Tris (pH 7.5) to a final concentration of 50  
560 mM. Samples were subjected to SDS-PAGE and gels stained with SYPRO® Ruby  
561 Protein Gel Stain (ThermoFisher).



562 Disulfide crosslinking was performed by incubating 3  $\mu$ M ClpC in buffer A (in the  
563 absence or presence of 2 mM nucleotide). MecA (4.5  $\mu$ M) was added as indicated  
564 MecA and 2 mM  $\beta$ -Mercaptoethanol at 25°C for 5 minutes. Crosslinking was  
565 started by addition of copper-phenanthroline to a final concentration of 100  $\mu$ M.  
566 Aliquots were taken and crosslinking was stopped by adding SDS sample buffer  
567 without  $\beta$ -mercaptoethanol but containing 4 mM iodacetamide. Samples were  
568 boiled and analyzed by SDS-PAGE followed by Coomassie staining.

569 Crosslinking was performed in three independent experiments each and  
570 representative results are provided.

571

#### 572 *Anisotropy measurements*

573 FITC-casein (100 nM) was incubated with varying concentrations ClpC in buffer  
574 A with 2 mM DTT for 1 h in absence or presence of 2 mM ATP $\gamma$ S. Changes in  
575 fluorescence polarization were determined using a CLARIOstar plate reader  
576 (BMG Labtech) at 482 and 530 nm excitation and emission wavelengths (Target  
577 mP 35).

#### 578 *Western blotting*

579 SDS-PAGEs were transferred to nitrocellulose or PVDF membranes by semi-dry  
580 blotting or wet blot transfer. Membranes were subsequently blocked with either  
581 3% BSA (w/v) or 5% (w/v) skim milk powder in TBS-T. Custom-made  
582 antibodies were used at the following dilutions: anti-ClpC (*B. subtilis*) 1:100.000,  
583 anti-ClpE 1:30.000, anti-ClpC (*S. aureus*) 1:50.000 and anti-MecA 1:30.000. anti-  
584 rabbit alkaline phosphatase conjugate (Vector Laboratories) was used as

585 secondary antibody (1:10.000). Blots were developed using NBT/BCIP or ECF™  
586 Substrate (GE Healthcare) as reagent and imaged via Image-Reader LAS-4000  
587 (Fujifilm). Western blotting was performed in three independent experiments  
588 each and representative results are provided.

589

## 590 **ClpC structure determination by cryo-electron microscopy**

### 591 *Cryo-electron microscopy*

592 *S. aureus* ClpC WT (6 μM) was incubated for 15 min at room temperature in 25  
593 mM Tris-HCl (pH 7.5), 25 mM KCl, 10 mM MgCl<sub>2</sub>, 1 mM DTT and 2 mM ATPγS.  
594 For ClpC-MecA complex formation, *S. aureus* MecA was incubated with ClpC in a  
595 3:1 molar ratio. Samples were vitrified with liquid ethane on Quantifoil R2/2  
596 grids using a Vitrobot Mark IV (FEI) at 100% humidity, 24°C temperature and  
597 blotting time of 3 seconds.

598 Images of ClpC were collected using the EPU software on a Titan Krios TEM (FEI)  
599 operating at 300kV, using a Falcon 2 direct electron detector (FEI). Images of  
600 ClpC in complex with MecA were collected using the EPU software on a Titan  
601 Krios TEM (FEI) operating at 300kV equipped with a Gatan K2 Summit direct  
602 electron detector and bioquantum energy filter with 20 eV slit. The defocus  
603 range was set between -1 and -3 μm with a total dose of 30 electrons/Å<sup>2</sup> in 17  
604 frames for ClpC and 50 electrons/Å<sup>2</sup> in 40 frames for ClpC-MecA. Pixel size was  
605 1.34 Å/pixel for ClpC and 1.37 Å/pixel for ClpC-MecA.

### 606 *Image processing*

607 Movie frames alignment with dose weighting <sup>59</sup> and CTF estimation <sup>60</sup> was  
608 performed on-the-fly using a Scipion suite <sup>61</sup>. ClpC particles were picked with

609 Gautomatch and a dataset of ~90.000 particles from 1100 micrographs was  
610 generated. ClpC-MecA complex particles were picked using Gaussian picking in  
611 RELION <sup>62</sup> and ~500.000 particles from 2100 micrographs were obtained. The  
612 initial datasets were subjected to reference-free 2D classification in order to  
613 clean the datasets.

614 Initially, for 3D processing of ClpC (**Supplementary Fig. 4**), the crystal structure  
615 of ClpC-MecA <sup>30</sup> low-pass filtered at 60 Å was used, but the dataset failed to  
616 refine. Attempts to use *ab initio* models generated with Eman2 <sup>63</sup> also did not  
617 result in high-resolution 3D refinement. As the ClpC assembly appeared much  
618 larger in size than the ClpC-MecA hexamer, we generated a cylindrical starting  
619 model by filtering to 70 Å two copies of ClpC-MecA stuck back to back with the  
620 AAA2 rings in contact. With this starting model ClpC refined to 8.4 Å resolution  
621 as estimated with the 0.143 FSC criterion, with visible separated helices. The  
622 same result was confirmed by generating an *ab-initio* starting model using the  
623 SGD method implemented in cryoSPARC <sup>64</sup> and refining the structure within the  
624 same program suite. Reconstructions with and without C2 symmetry applied  
625 were performed (**Supplementary Fig. 4, g-h**) to a similar resolution and the C2  
626 map was used for display as it allows a better visualization of N-domains.

627 For 3D processing of ClpC-MecA (**Supplementary Fig. 5**) the crystal structure of  
628 the *B. subtilis* ClpC-MecA complex filtered at 60Å was used (pdb code: 3PXI). A  
629 large dataset was initially used, but particles were preferentially oriented so a  
630 reduced dataset (~30.000 particles) with balanced angular distribution was  
631 used to reduce anisotropy. Both asymmetric and six fold symmetric maps were  
632 built. Even though the nominal resolution of the symmetrized map was better,  
633 the reconstruction appeared over filtered, thus indicating that artifacts were

634 caused by forced symmetrisation. The final map was reconstructed at 11 Å  
635 resolution. Local resolution was evaluated using the local resolution tool of  
636 RELION.

### 637 *Model building and fitting*

638 Models of *S. aureus* ClpC and MecA were generated using Phyre <sup>65</sup>. The N-  
639 domain to AAA1 link was refined using the Chimera loops modeller tool <sup>66</sup>. Initial  
640 manual fitting was performed and then automatically refines using Imodfit <sup>67</sup>.

641

### 642 **Spot tests**

643 *E. coli* cells harboring plasmid-encoded *clpC* alleles were grown in the absence of  
644 IPTG overnight at 30°C. Serial dilutions were prepared, spotted on LB-plates  
645 containing different IPTG concentrations and incubated for 24 h at indicated  
646 temperatures. *B. subtilis* strains were inoculated with a fresh overnight culture to  
647 an OD<sub>600</sub> of 0.05 and grown to mid-exponential growth phase. Optical densities  
648 of all strains were adjusted to OD<sub>600</sub> of 1, serial dilutions were performed and  
649 10 µl (10<sup>-2</sup> - 10<sup>-6</sup>) were dropped on agar plates (without or with 100 µM IPTG)  
650 and incubated overnight at indicated temperatures. Spot tests were performed in  
651 three independent experiments each and representative results are provided.

652

### 653 **Acknowledgments**

654 K. B. F. was supported by the Hartmut Hoffmann-Berling International Graduate  
655 School of Molecular and Cellular Biology (HBIGS). This work was funded by  
656 grants of the Deutsche Forschungsgemeinschaft (BB617/17-2 and MO 970/4-2)

657 to B.B. and A.M. and a fellowship of the Hannover School for Biomolecular Drug  
658 Research to I.H. and the DFG grants Tu106/8-1 and Tu106/6-2 to K.T. The Cryo-EM  
659 facility at the Science for Life Laboratory Stockholm University (M.C.) is  
660 supported by grants from the Knut and Alice Wallenberg Foundation and the  
661 Family Erling Persson Foundation. We thank Stefan Fleischmann for IT support,  
662 Christos Savva for microscopy support, Björn Forsberg and Shintaro Aibara for  
663 image-processing discussions, Helen Saibil for support in the early stage of the  
664 project and Armgard Janczikowski for technical assistance.

665

666 **Competing interests:** No competing interests declared

667

#### 668 **Author contributions**

669 Conceived and designed experiments: M.C., K.B.F., M.M., J.J., I.H., F.G., D.L., S.G.,  
670 K.T., B.B., A.M. Performed experiments: M.C., K.B.F., M.M., J.J., I.H., F.G., D.L., S.G.  
671 Analyzed the data: M.C., K.B.F., M.M., J.J., I.H., F.G., D.L., S.G., K.T., B.B., A.M. Wrote  
672 the manuscript: M.C., B.B., A.M.

673

#### 674 **References**

- 675 1. Hanson, P.I. & Whiteheart, S.W. AAA+ proteins: have engine, will work.  
676 *Nat Rev Mol Cell Biol* **6**, 519-29 (2005).
- 677 2. Olivares, A.O., Baker, T.A. & Sauer, R.T. Mechanistic insights into bacterial  
678 AAA+ proteases and protein-remodelling machines. *Nat Rev Microbiol* **14**,  
679 33-44 (2016).
- 680 3. Nyquist, K. & Martin, A. Marching to the beat of the ring: polypeptide  
681 translocation by AAA+ proteases. *Trends Biochem Sci* **39**, 53-60 (2014).

- 682 4. Gur, E., Ottofueling, R. & Dougan, D.A. Machines of destruction - AAA+  
683 proteases and the adaptors that control them. *Subcell Biochem* **66**, 3-33  
684 (2013).
- 685 5. Doyle, S.M., Genest, O. & Wickner, S. Protein rescue from aggregates by  
686 powerful molecular chaperone machines. *Nat Rev Mol Cell Biol* **14**, 617-29  
687 (2013).
- 688 6. Mogk, A., Kummer, E. & Bukau, B. Cooperation of Hsp70 and Hsp100  
689 chaperone machines in protein disaggregation. *Front Mol Biosci* **2**, 22  
690 (2015).
- 691 7. Collins, G.A. & Goldberg, A.L. The Logic of the 26S Proteasome. *Cell* **169**,  
692 792-806 (2017).
- 693 8. Baker, T.A. & Sauer, R.T. ClpXP, an ATP-powered unfolding and protein-  
694 degradation machine. *Biochim Biophys Acta* **1823**, 15-28 (2012).
- 695 9. Oguchi, Y. et al. A tightly regulated molecular toggle controls AAA+  
696 disaggregase. *Nat Struct Mol Biol* **19**, 1338-46 (2012).
- 697 10. Schirmer, E.C., Homann, O.R., Kowal, A.S. & Lindquist, S. Dominant gain-of-  
698 function mutations in Hsp104p reveal crucial roles for the middle region.  
699 *Mol Biol Cell* **15**, 2061-72 (2004).
- 700 11. Lipinska, N. et al. Disruption of ionic interactions between the nucleotide  
701 binding domain 1 (NBD1) and middle (M) domain in Hsp100  
702 disaggregase unleashes toxic hyperactivity and partial independence  
703 from Hsp70. *J Biol Chem* **288**, 2857-69 (2013).
- 704 12. Mika, F. & Hengge, R. A two-component phosphotransfer network  
705 involving ArcB, ArcA, and RssB coordinates synthesis and proteolysis of  
706 sigmaS (RpoS) in *E. coli*. *Genes Dev* **19**, 2770-81 (2005).
- 707 13. Bougdour, A., Wickner, S. & Gottesman, S. Modulating RssB activity: IraP, a  
708 novel regulator of sigma(S) stability in *Escherichia coli*. *Genes Dev* **20**,  
709 884-97 (2006).
- 710 14. Battesti, A. et al. Anti-adaptors provide multiple modes for regulation of  
711 the RssB adaptor protein. *Genes Dev* **27**, 2722-35 (2013).
- 712 15. Turgay, K., Hahn, J., Burghoorn, J. & Dubnau, D. Competence in *Bacillus*  
713 *subtilis* is controlled by regulated proteolysis of a transcription factor.  
714 *EMBO J.* **17**, 6730-6738 (1998).
- 715 16. Schlothauer, T., Mogk, A., Dougan, D.A., Bukau, B. & Turgay, K. MecA, an  
716 adaptor protein necessary for ClpC chaperone activity. *Proc Natl Acad Sci*  
717 *USA* **100**, 2306-11 (2003).
- 718 17. Carroni, M. et al. Head-to-tail interactions of the coiled-coil domains  
719 regulate ClpB activity and cooperation with Hsp70 in protein  
720 disaggregation. *Elife* **3**, e02481 (2014).
- 721 18. Heuck, A. et al. Structural basis for the disaggregase activity and  
722 regulation of Hsp104. *Elife* **5**(2016).
- 723 19. Rosenzweig, R., Moradi, S., Zarrine-Afsar, A., Glover, J.R. & Kay, L.E.  
724 Unraveling the mechanism of protein disaggregation through a ClpB-  
725 DnaK interaction. *Science* **339**, 1080-3 (2013).
- 726 20. Lee, J. et al. Heat shock protein (Hsp) 70 is an activator of the Hsp104  
727 motor. *Proc Natl Acad Sci USA* **110**, 8513-8 (2013).
- 728 21. Turgay, K., Hamoen, L.W., Venema, G. & Dubnau, D. Biochemical  
729 characterization of a molecular switch involving the heat shock protein

- 730 ClpC, which controls the activity of ComK, the competence transcription  
731 factor of *Bacillus subtilis*. *Genes Dev* **11**, 119-28 (1997).
- 732 22. Frees, D., Gerth, U. & Ingmer, H. Clp chaperones and proteases are central  
733 in stress survival, virulence and antibiotic resistance of *Staphylococcus*  
734 *aureus*. *Int J Med Microbiol* **304**, 142-9 (2014).
- 735 23. Trentini, D.B. et al. Arginine phosphorylation marks proteins for  
736 degradation by a Clp protease. *Nature* **539**, 48-53 (2016).
- 737 24. Capestany, C.A., Tribble, G.D., Maeda, K., Demuth, D.R. & Lamont, R.J. Role  
738 of the Clp system in stress tolerance, biofilm formation, and intracellular  
739 invasion in *Porphyromonas gingivalis*. *J Bacteriol* **190**, 1436-46 (2008).
- 740 25. Msadek, T., Kunst, F. & Rapoport, G. MecB of *Bacillus subtilis*, a member of  
741 the ClpC ATPase family, is a pleiotropic regulator controlling competence  
742 gene expression and growth at high temperature. *Proc Natl Acad Sci U S A*  
743 **91**, 5788-92 (1994).
- 744 26. Kruger, E., Volker, U. & Hecker, M. Stress induction of *clpC* in *Bacillus*  
745 *subtilis* and its involvement in stress tolerance. *J Bacteriol* **176**, 3360-7  
746 (1994).
- 747 27. Kruger, E., Witt, E., Ohlmeier, S., Hanschke, R. & Hecker, M. The *clp*  
748 proteases of *Bacillus subtilis* are directly involved in degradation of  
749 misfolded proteins. *J Bacteriol* **182**, 3259-65 (2000).
- 750 28. Lourdault, K., Cerqueira, G.M., Wunder, E.A., Jr. & Picardeau, M.  
751 Inactivation of *clpB* in the pathogen *Leptospira interrogans* reduces  
752 virulence and resistance to stress conditions. *Infect Immun* **79**, 3711-7  
753 (2011).
- 754 29. Mei, Z. et al. Molecular determinants of MecA as a degradation tag for the  
755 ClpCP protease. *J Biol Chem* **284**, 34366-75 (2009).
- 756 30. Wang, F. et al. Structure and mechanism of the hexameric MecA-ClpC  
757 molecular machine. *Nature* **471**, 331-335 (2011).
- 758 31. Brotz-Oesterhelt, H. & Sass, P. Bacterial caseinolytic proteases as novel  
759 targets for antibacterial treatment. *Int J Med Microbiol* **304**, 23-30 (2014).
- 760 32. Conlon, B.P. et al. Activated ClpP kills persisters and eradicates a chronic  
761 biofilm infection. *Nature* **503**, 365-70 (2013).
- 762 33. Brotz-Oesterhelt, H. et al. Dysregulation of bacterial proteolytic  
763 machinery by a new class of antibiotics. *Nat Med* **11**, 1082-7 (2005).
- 764 34. Kirstein, J. et al. The antibiotic ADEP reprogrammes ClpP, switching it  
765 from a regulated to an uncontrolled protease. *EMBO Molecular Medicine* **1**,  
766 37-49 (2009).
- 767 35. Hinnerwisch, J., Fenton, W.A., Furtak, K.J., Farr, G.W. & Horwich, A.L. Loops  
768 in the Central Channel of ClpA Chaperone Mediate Protein Binding,  
769 Unfolding, and Translocation. *Cell* **121**, 1029-41 (2005).
- 770 36. Piszczek, G., Rozycki, J., Singh, S.K., Ginsburg, A. & Maurizi, M.R. The  
771 molecular chaperone, ClpA, has a single high affinity peptide binding site  
772 per hexamer. *J Biol Chem* **280**, 12221-30 (2005).
- 773 37. Siddiqui, S.M., Sauer, R.T. & Baker, T.A. Role of the processing pore of the  
774 ClpX AAA+ ATPase in the recognition and engagement of specific protein  
775 substrates. *Genes Dev* **18**, 369-74 (2004).
- 776 38. Beinker, P., Schlee, S., Groemping, Y., Seidel, R. & Reinstein, J. The N  
777 Terminus of ClpB from *Thermus thermophilus* Is Not Essential for the  
778 Chaperone Activity. *J Biol Chem* **277**, 47160-6. (2002).

- 779 39. Rosenzweig, R. et al. ClpB N-terminal domain plays a regulatory role in  
780 protein disaggregation. *Proc Natl Acad Sci U S A* **112**, E6872-81 (2015).
- 781 40. Kirstein, J. et al. Adaptor protein controlled oligomerization activates the  
782 AAA+ protein ClpC. *Embo J* **25**, 1481-91 (2006).
- 783 41. Persuh, M., Turgay, K., Mandic-Mulec, I. & Dubnau, D. The N and the C-  
784 terminal domains of MecA recognize different partners in the competence  
785 molecular switch. *Mol. Microbiol.* **33**, 886-894 (1999).
- 786 42. Flynn, J.M. et al. Overlapping recognition determinants within the ssrA  
787 degradation tag allow modulation of proteolysis. *Proc Natl Acad Sci U S A*  
788 **98**, 10584-9 (2001).
- 789 43. Liu, J. et al. Structural dynamics of the MecA-ClpC complex: a type II AAA+  
790 protein unfolding machine. *J Biol Chem* **288**, 17597-608 (2013).
- 791 44. Lee, S. et al. The Structure of ClpB. A Molecular Chaperone that Rescues  
792 Proteins from an Aggregated State. *Cell* **115**, 229-40 (2003).
- 793 45. Guo, F., Maurizi, M.R., Esser, L. & Xia, D. Crystal structure of ClpA, an  
794 Hsp100 chaperone and regulator of ClpAP protease. *J Biol Chem* **277**,  
795 46743-52. (2002).
- 796 46. Monroe, N., Han, H., Shen, P.S., Sundquist, W.I. & Hill, C.P. Structural basis  
797 of protein translocation by the Vps4-Vta1 AAA ATPase. *Elife* **6**(2017).
- 798 47. Gerth, U. et al. Fine-tuning in regulation of Clp protein content in *Bacillus*  
799 *subtilis*. *J Bacteriol* **186**, 179-91 (2004).
- 800 48. Miethke, M., Hecker, M. & Gerth, U. Involvement of *Bacillus subtilis* ClpE in  
801 CtsR degradation and protein quality control. *J Bacteriol* **188**, 4610-9  
802 (2006).
- 803 49. Seyffer, F. et al. Hsp70 proteins bind Hsp100 regulatory M domains to  
804 activate AAA+ disaggregase at aggregate surfaces. *Nat Struct Mol Biol* **19**,  
805 1347-55 (2012).
- 806 50. Kirstein, J., Dougan, D.A., Gerth, U., Hecker, M. & Turgay, K. The tyrosine  
807 kinase McsB is a regulated adaptor protein for ClpCP. *EMBO J* **26**, 2061-70  
808 (2007).
- 809 51. Preissler, S. et al. Physiological modulation of BiP activity by trans-  
810 protomer engagement of the interdomain linker. *Elife* **4**, e08961 (2015).
- 811 52. Mueller-Cajar, O. et al. Structure and function of the AAA+ protein CbbX, a  
812 red-type Rubisco activase. *Nature* **479**, 194-9 (2011).
- 813 53. Malik, I.T. & Brotz-Oesterhelt, H. Conformational control of the bacterial  
814 Clp protease by natural product antibiotics. *Nat Prod Rep* (2017).
- 815 54. Culp, E. & Wright, G.D. Bacterial proteases, untapped antimicrobial drug  
816 targets. *J Antibiot (Tokyo)* **70**, 366-377 (2017).
- 817 55. Schmitt, E.K. et al. The natural product cyclomarin kills *Mycobacterium*  
818 *tuberculosis* by targeting the ClpC1 subunit of the caseinolytic protease.  
819 *Angew Chem Int Ed Engl* **50**, 5889-91 (2011).
- 820 56. Gao, W. et al. The Cyclic Peptide Ecumicin Targeting ClpC1 Is Active  
821 against *Mycobacterium tuberculosis* In Vivo. *Antimicrob Agents*  
822 *Chemother* **59**, 880-9 (2015).
- 823 57. Gavrish, E. et al. Lassomycin, a ribosomally synthesized cyclic peptide,  
824 kills *mycobacterium tuberculosis* by targeting the ATP-dependent  
825 protease ClpC1P1P2. *Chem Biol* **21**, 509-18 (2014).
- 826 58. Anagnostopoulos, C. & Spizizen, J. Requirements for Transformation in  
827 *Bacillus Subtilis*. *J Bacteriol* **81**, 741-6 (1961).



- 828 59. Zheng, S.Q. et al. MotionCor2: anisotropic correction of beam-induced  
829 motion for improved cryo-electron microscopy. *Nat Methods* **14**, 331-332  
830 (2017).
- 831 60. Rohou, A. & Grigorieff, N. CTFFIND4: Fast and accurate defocus estimation  
832 from electron micrographs. *J Struct Biol* **192**, 216-21 (2015).
- 833 61. de la Rosa-Trevin, J.M. et al. Scipion: A software framework toward  
834 integration, reproducibility and validation in 3D electron microscopy. *J*  
835 *Struct Biol* **195**, 93-9 (2016).
- 836 62. Scheres, S.H. RELION: implementation of a Bayesian approach to cryo-EM  
837 structure determination. *J Struct Biol* **180**, 519-30 (2012).
- 838 63. Tang, G. et al. EMAN2: an extensible image processing suite for electron  
839 microscopy. *J Struct Biol* **157**, 38-46 (2007).
- 840 64. Punjani, A., Rubinstein, J.L., Fleet, D.J. & Brubaker, M.A. cryoSPARC:  
841 algorithms for rapid unsupervised cryo-EM structure determination. *Nat*  
842 *Methods* **14**, 290-296 (2017).
- 843 65. Kelley, L.A. & Sternberg, M.J. Protein structure prediction on the Web: a  
844 case study using the Phyre server. *Nat Protoc* **4**, 363-71 (2009).
- 845 66. Pettersen, E.F. et al. UCSF Chimera--a visualization system for exploratory  
846 research and analysis. *J Comput Chem* **25**, 1605-12 (2004).
- 847 67. Lopez-Blanco, J.R. & Chacon, P. iMODFIT: efficient and robust flexible  
848 fitting based on vibrational analysis in internal coordinates. *J Struct Biol*  
849 **184**, 261-70 (2013).

850

851

852

853

854

855

856

857

858

859

860 **Figure legends**

861 **Figure 1**

862 ClpC MD mutants exhibit adaptor-independent proteolytic activity. **(A/B)** FITC-  
863 casein degradation was monitored in the presence of ClpP (P) only, or in  
864 presence of ClpC wild type (WT,  $\pm$  MecA ) and indicated MD mutants (without  
865 MecA). Degradation rates were determined from the initial linear increase of  
866 FITC fluorescence. **(C-E)** GFP-SsrA degradation was monitored in the presence of  
867 ClpP and indicated ClpC variants. Deletion of the N-terminal domain ( $\Delta$ N)  
868 unleashes high proteolytic activity of MD mutants. GFP-SsrA degradation rates  
869 were determined from the initial linear decrease of GFP-SsrA fluorescence.

870

871 **Figure 2**

872 ClpC MD mutants exhibit increased basal ATPase activity that can be stimulated  
873 by substrate. **(A)** ATPase activities of ClpC wild type (WT) and indicated deletion  
874 variants ( $\Delta$ N,  $\Delta$ M) and MD mutants were determined in absence and presence of  
875 MecA. **(B)** ATPase activities of ClpC wild type (WT,  $\pm$  MecA) and indicated MD  
876 mutants were determined in absence and presence of substrate casein. ATPase  
877 activities determined without casein were set as 1 and the relative increase of  
878 ATP hydrolysis in presence of casein was determined (stimulation factor).

879

880

881

882 **Figure 3**

883 Cryo-EM structures of *S. aureus* ClpC-ATP $\gamma$ S with and without MecA. **(A)**  
884 Overview of ClpC 3D density map showing two open spirals that interact in a  
885 head-to-head manner. **(B)** ClpC density map coloured by domains. Head-to-head  
886 interactions between MDs (green) of each helical assembly are key contacts  
887 stabilizing the ClpC resting state. ClpC domain organization is given, including an  
888 N-terminal domain (NT), two AAA-domains (AAA-1, AAA-2) and the inserted  
889 coiled-coil M-domain (MD). **(C)** Details of fitting for each ClpC subdomain. **(D)**  
890 Zoomed view into MD-MD contacts highlighting conserved MD residues involved  
891 in interactions. **(E)** Structure of the ClpC-MecA complex. Fitted atomic model  
892 coloured by ClpC domains as in b and MecA C-terminal domains (purple).  
893 Density for MecA N-terminal domains is indicated.

894

895 **Figure 4**

896 Disulfide crosslinking demonstrates MecA-sensitive head-to-head MD contacts.  
897 **(A)** Disulfide crosslinking of ClpC-C311T/E437C under oxidizing conditions was  
898 performed in presence of ATP $\gamma$ S or ATP without or with MecA and analyzed by  
899 subsequent non-reducing SDS-PAGE. A model of head-to-head interacting MDs is  
900 given and the position of E437 is indicated. **(b)** Disulfide crosslinking of ClpC-  
901 C311T/E437C and ClpC-C311T/F436A/E437C was performed in presence of  
902 ATP $\gamma$ S under oxidizing (+ Cu(Phe<sub>3</sub>)) and reducing (+  $\beta$ -mercaptoethanol) conditions  
903 and analyzed by subsequent non-reducing SDS-PAGE.

904

905 **Figure 5**

906 ClpC forms a large, inactive resting state that is sensitive to MecA and MD  
907 mutation. (A) Glutaraldehyde crosslinking of ClpC-E280A/E618A (ClpC-DWB)  
908 and a respective MD mutant variant (F436A) was performed in absence and  
909 presence of ATP without and with MecA as indicated. Crosslinking of *E. coli* ClpB  
910 in presence of ATP $\gamma$ S served as reference defining crosslinked hexameric  
911 assemblies. Crosslink products were analyzed by SDS-PAGE. (B) Oligomeric  
912 states of ClpC-DWB and ClpC-F436A-DWB were determined in absence and  
913 presence of ATP. Addition of MecA and casein is indicated. Elution fractions were  
914 analyzed by SDS-PAGE and quantified. Positions of peak fractions of a protein  
915 standard and ClpB-E279A/E678A hexamers (+ATP) are indicated. (C)  
916 Micrograph of ClpC-F436A sample in presence of casein (top). Examples of single  
917 particles are circled. 2D class averages of ClpC-F436A (bottom). Scale bar is 10  
918 nm. (D) Binding of FITC-casein to ClpC-DWB and ClpC-F436A-DWB was analyzed  
919 in presence of ATP by size exclusion chromatography. FITC-casein fluorescence  
920 of elution fractions was quantified. Positions of peak fractions of a protein  
921 standard and ClpB-E279A/E678A hexamers (+ATP) are indicated.

922

923 **Figure 6**

924 Loss of ClpC activity control is toxic *in vivo*. (A) *E. coli* cells constitutively  
925 expressing *S. aureus clpP* and harboring the indicated plasmid-encoded *clpC*  
926 alleles under control of an IPTG-regulatable promoter were grown overnight at  
927 30°C and adjusted to OD<sub>600</sub> of 1. Serial dilutions (10<sup>-2</sup> – 10<sup>-6</sup>) were spotted on LB

928 plates containing the indicated IPTG concentrations and incubated at 30°C, 37°C  
929 or 40°C for 24 h. **(B)** *B. subtilis*  $\Delta clpC$  control cells and  $\Delta clpC$  mutant cells  
930 harboring a *clpC* wild type (WT) or MD mutant (F436A) copy integrated at the  
931 *amyE*-locus under control of an IPTG-regulatable promoter were grown at 30°C  
932 to OD600 =1. Serial dilutions ( $10^{-2}$  –  $10^{-6}$ ) were spotted on LB plates without or  
933 with 100  $\mu$ M IPTG and incubated at 30°C, 37°C or 50°C for 24 h. **(C)** Sequence  
934 alignment of MDs from ClpC, ClpE and ClpL proteins. A highly conserved  
935 aromatic residue located at the tip of the coiled-coil structure is highlighted. **(D)**  
936 *B. subtilis* cells harboring an extra *clpE* wild type (WT) or MD mutant (Y344A)  
937 copy integrated at the *amyE*-locus under control of an IPTG-regulatable  
938 promoter were grown at 30°C to OD600 =1. Serial dilutions ( $10^{-2}$  –  $10^{-6}$ ) were  
939 spotted on LB plates without or with 100  $\mu$ M IPTG and incubated at 30°C, 37°C  
940 or 50°C for 24 h.

941

## 942 **Figure 7**

943 Regulatory coiled-coil MDs repress AAA+ protein activities by different  
944 mechanisms. ClpB is kept in a low activity resting state by long MDs forming a  
945 repressive belt around the hexameric AAA ring. MDs are kept in place by head-  
946 to-tail interactions between adjacent coiled-coils. In contrast, the ClpC resting  
947 state is formed by head-to-head MD contacts, allowing for assembly of two open  
948 ClpC spirals. Adaptor proteins of ClpB (DnaK) and ClpC (MecA) break MD  
949 contacts by binding to MD sites crucial for MD interactions. This results in AAA+  
950 protein activation by releasing MD repression on ATPase activity (ClpB) or  
951 allowing for formation of active hexamers (ClpC).

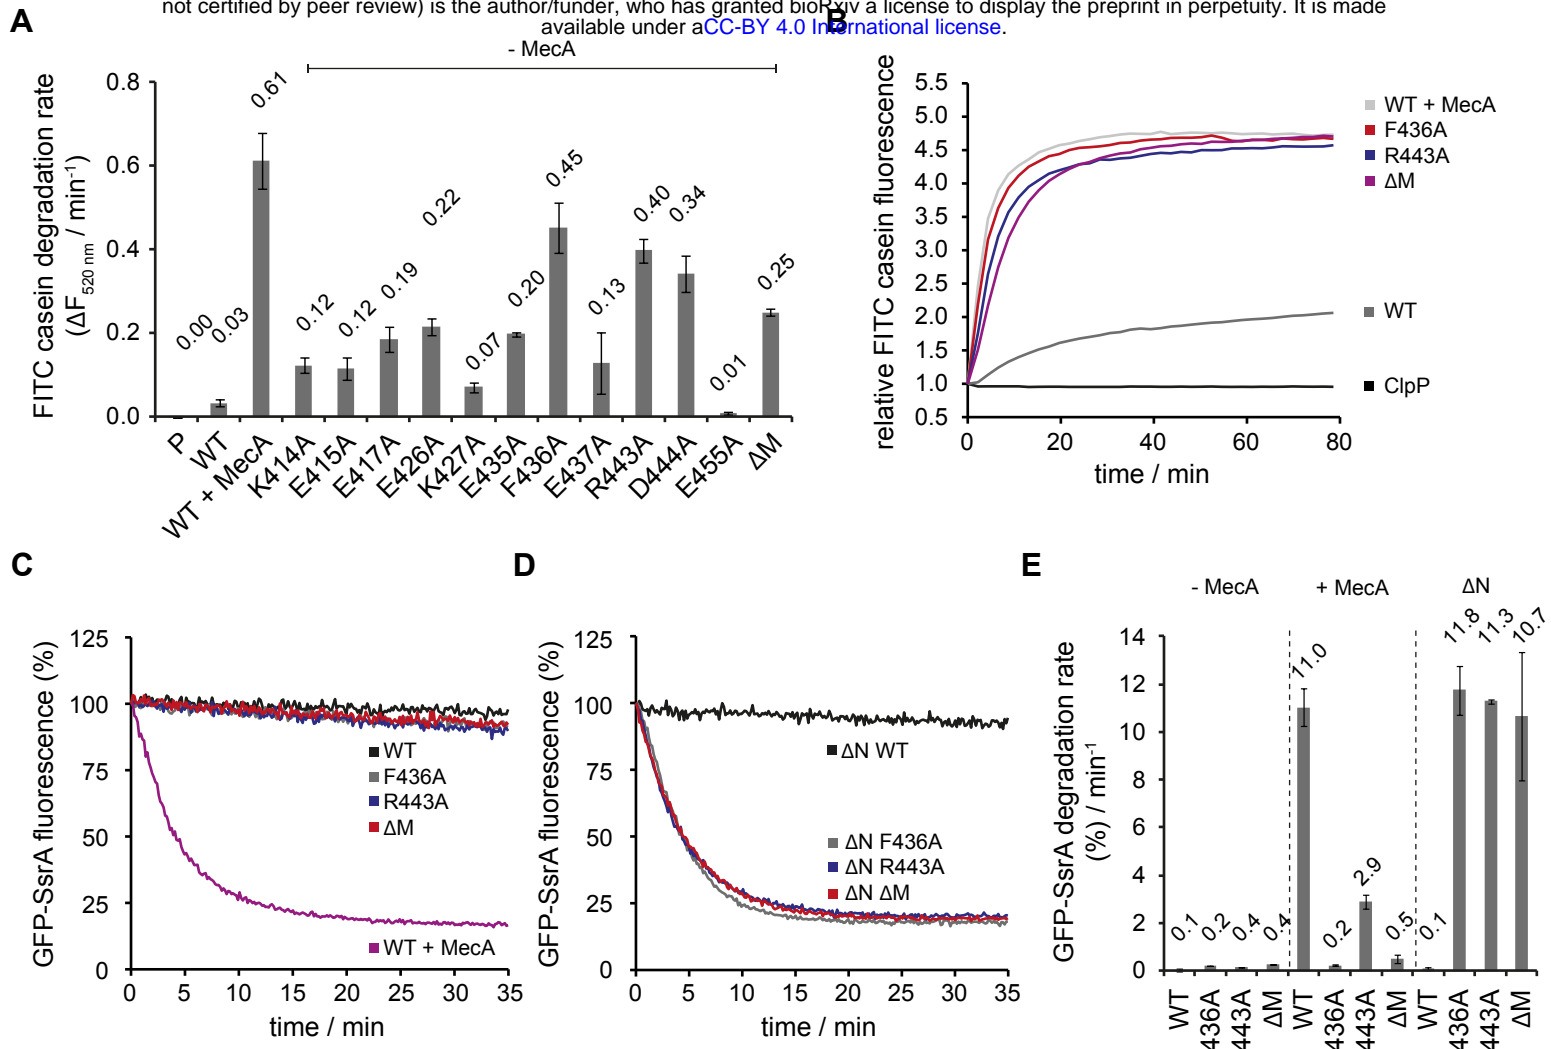

**Figure 2****A**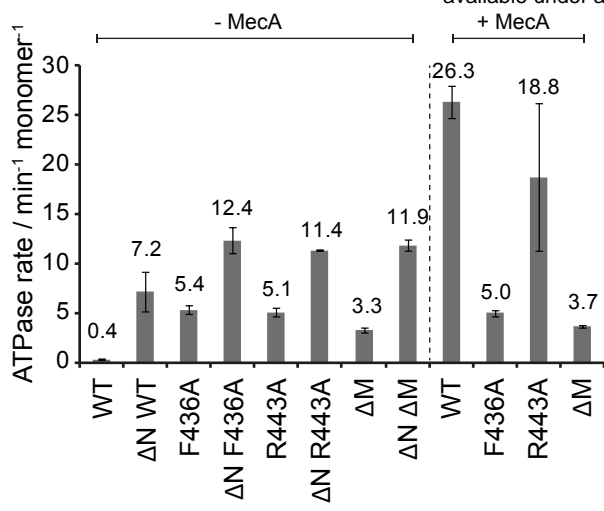**B**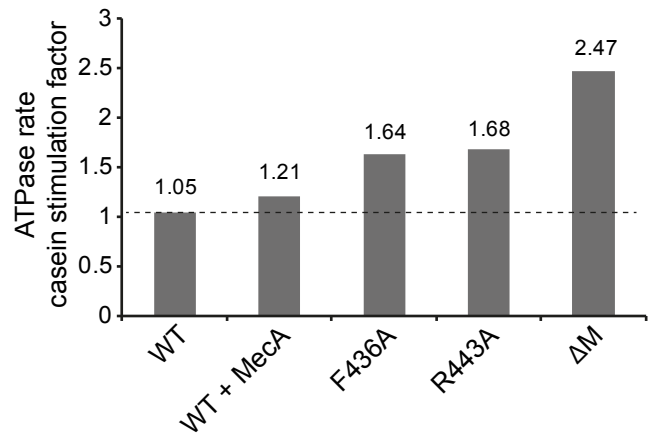

**Figure 3**

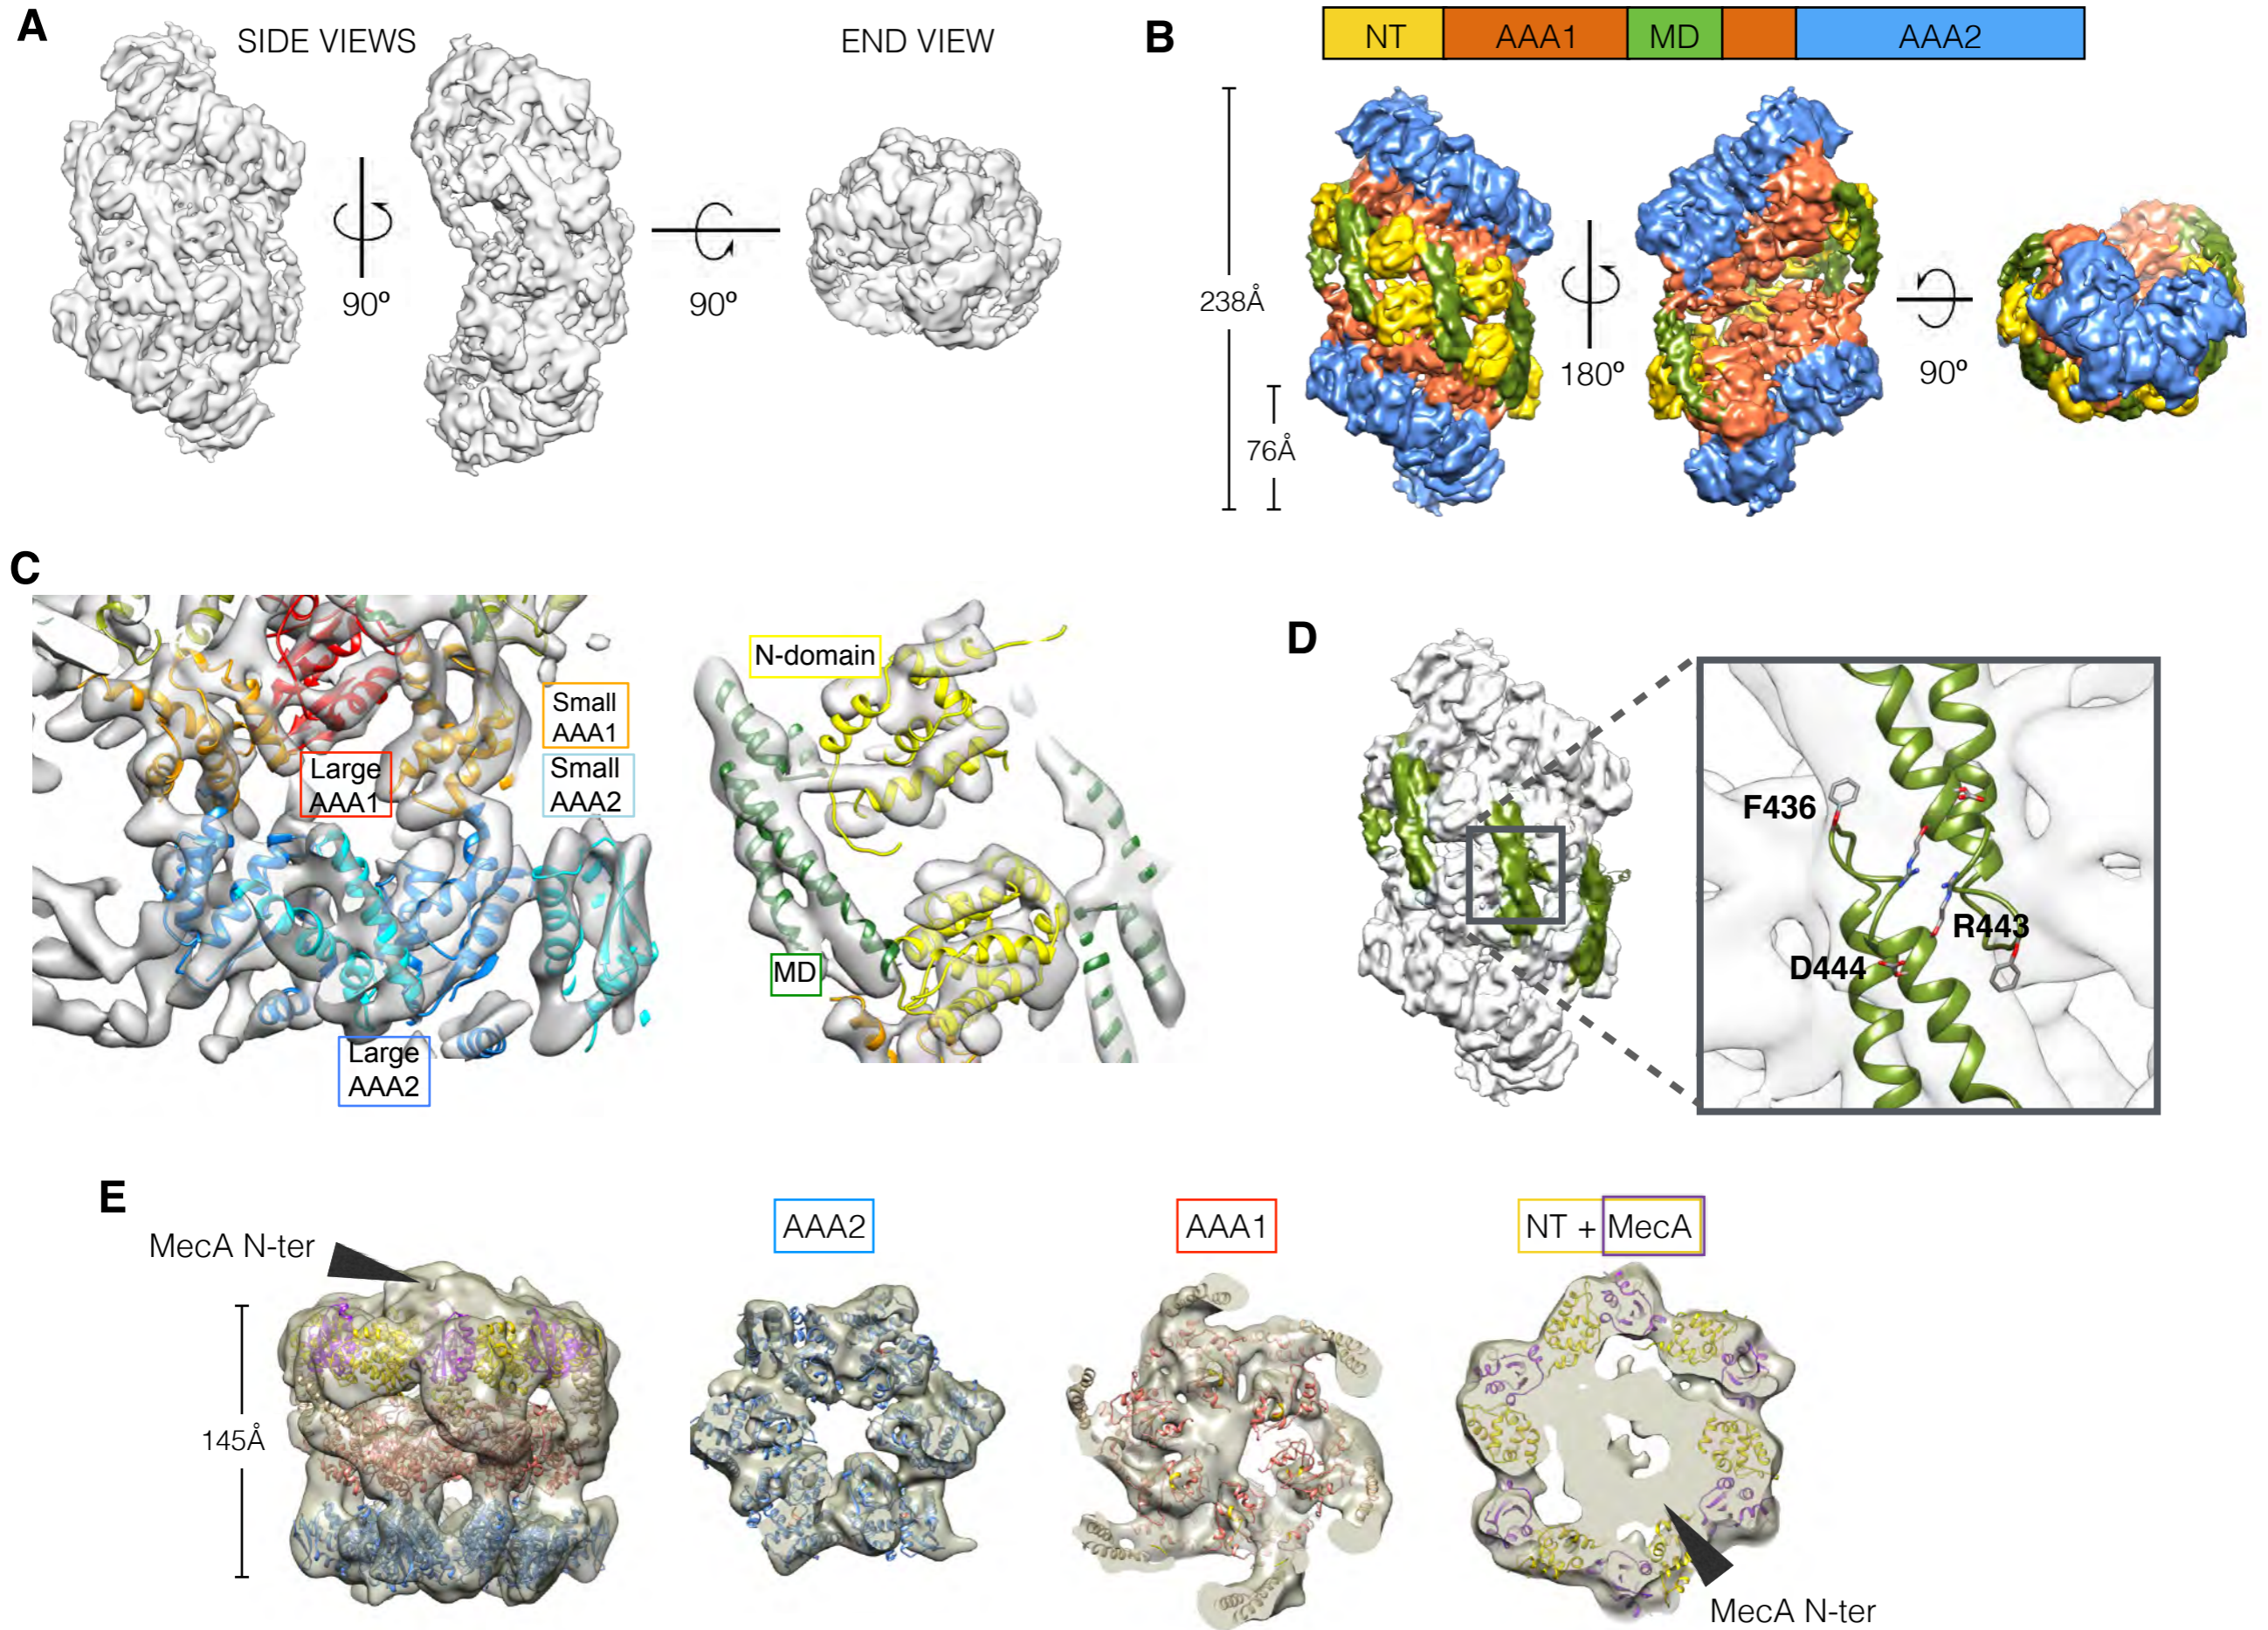



## Figure 4

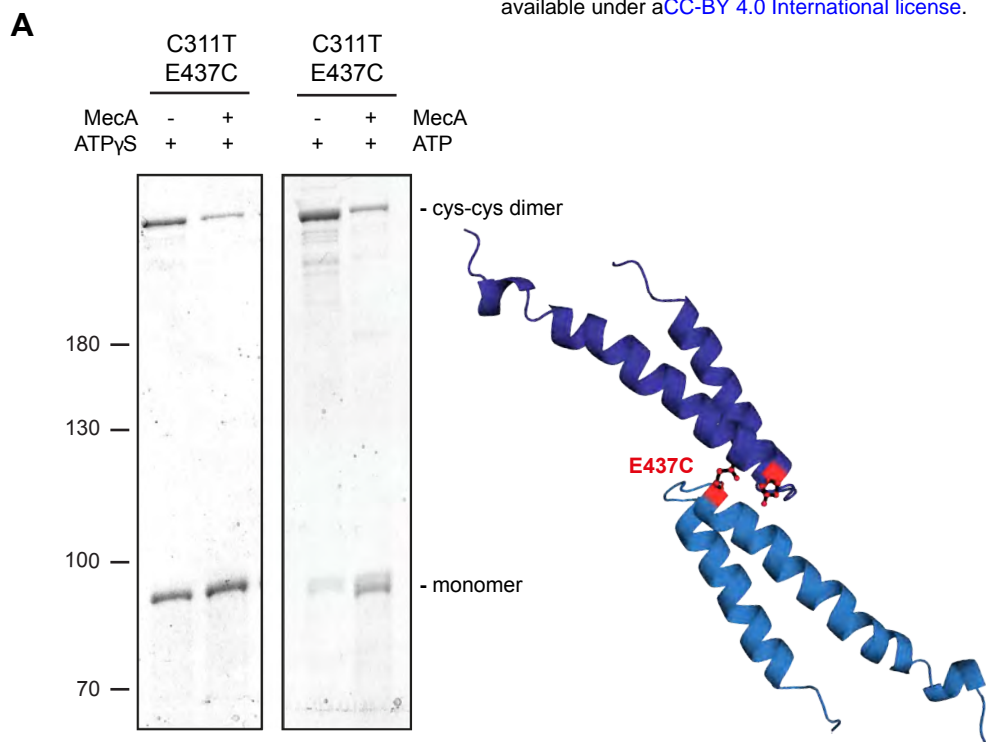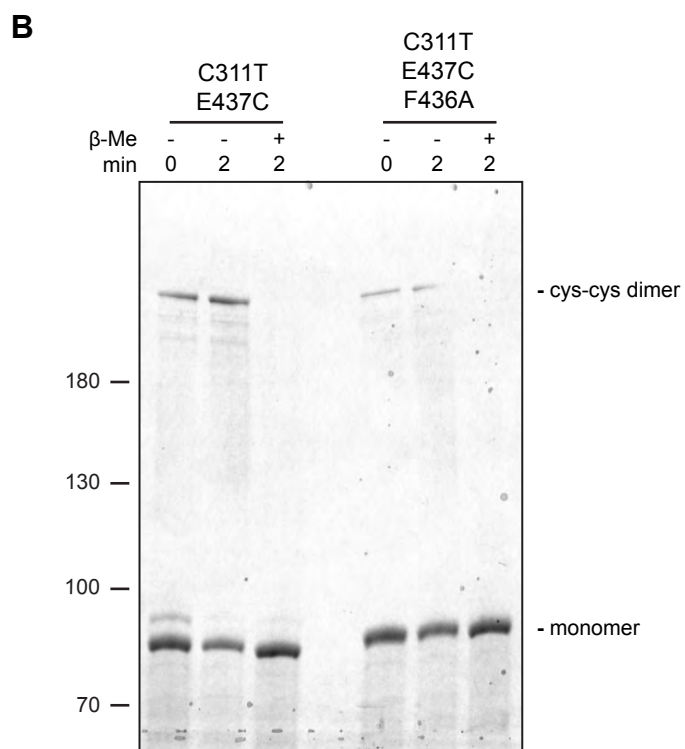

**A**

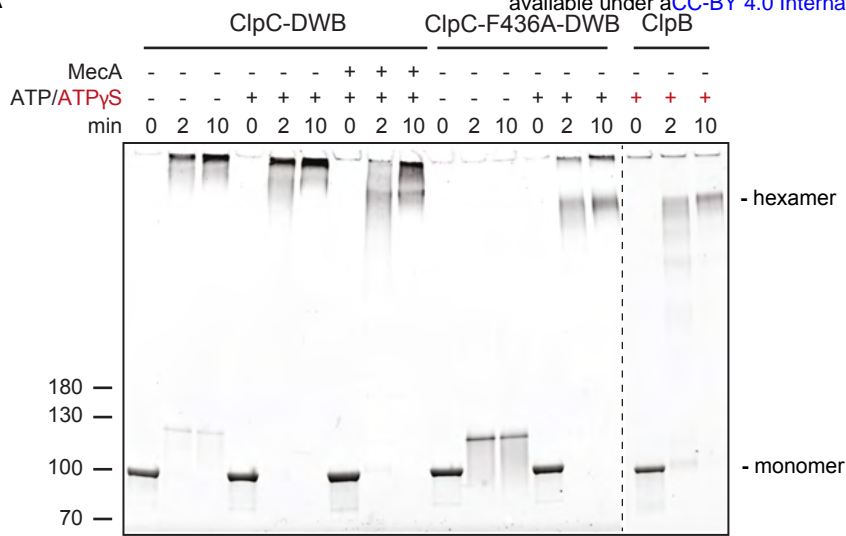

**B**

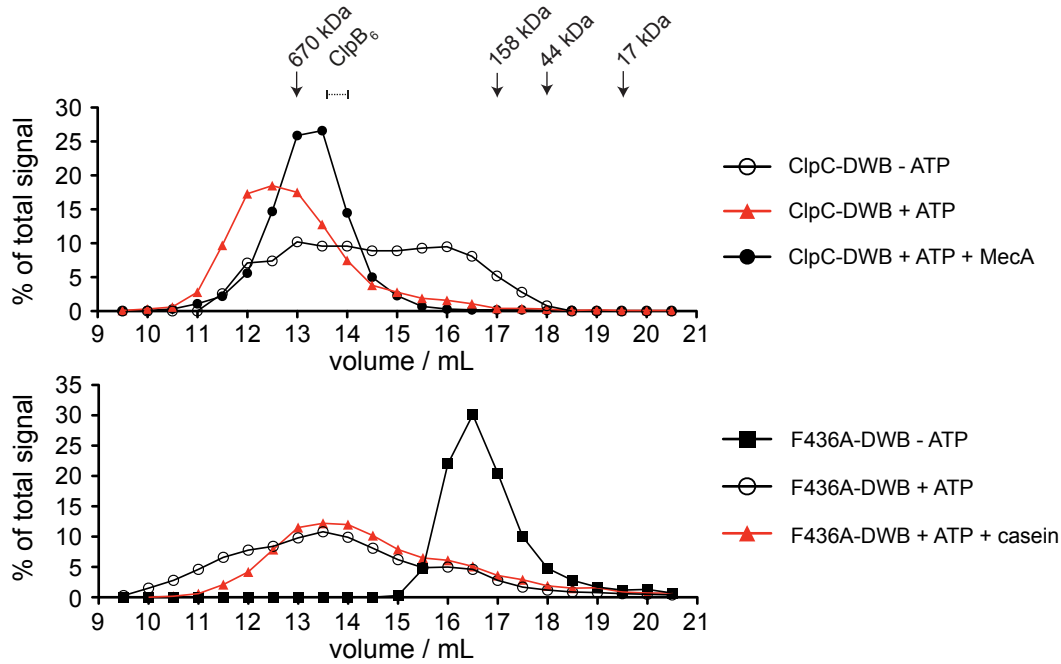

**C**

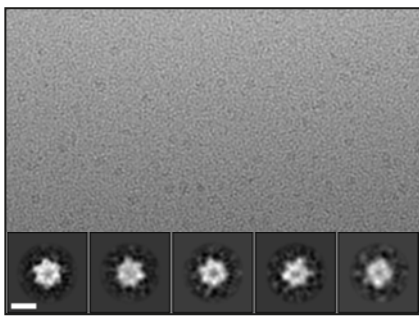

**D**

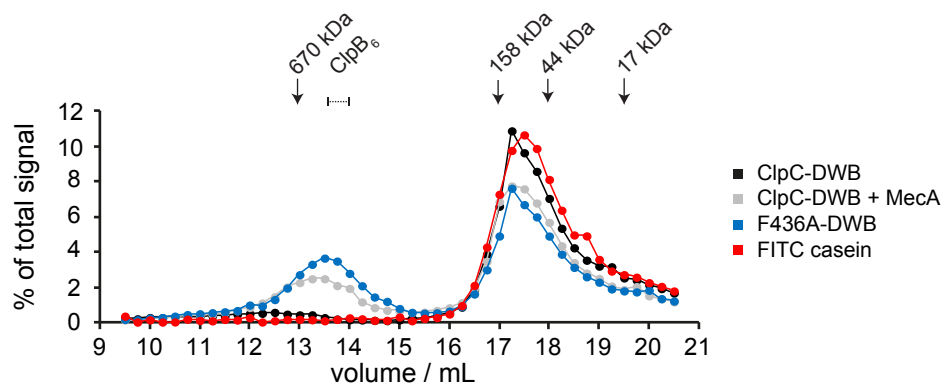

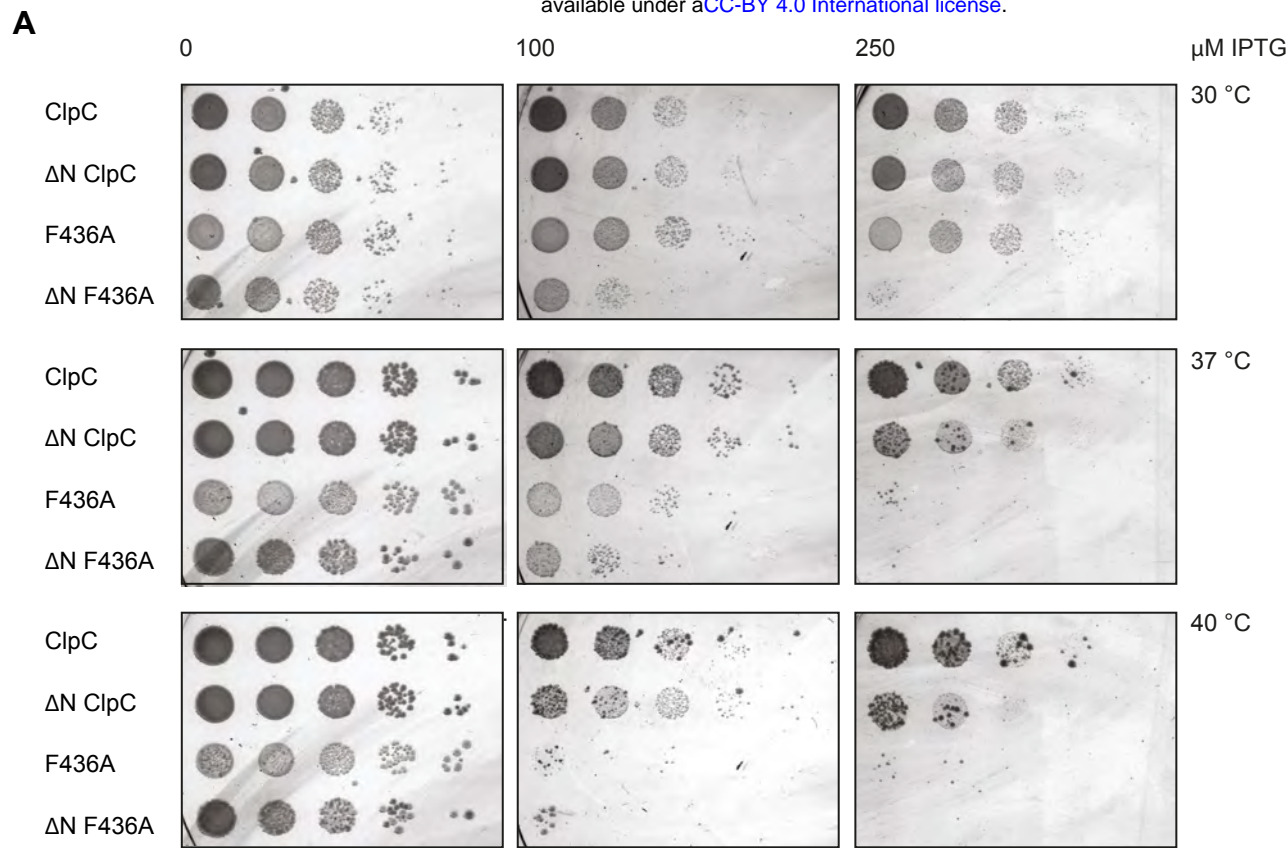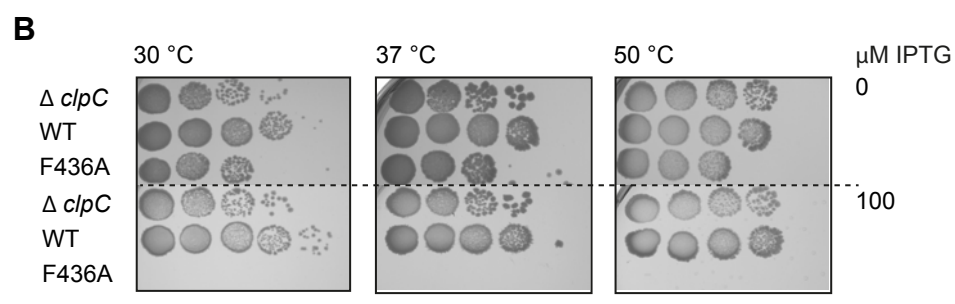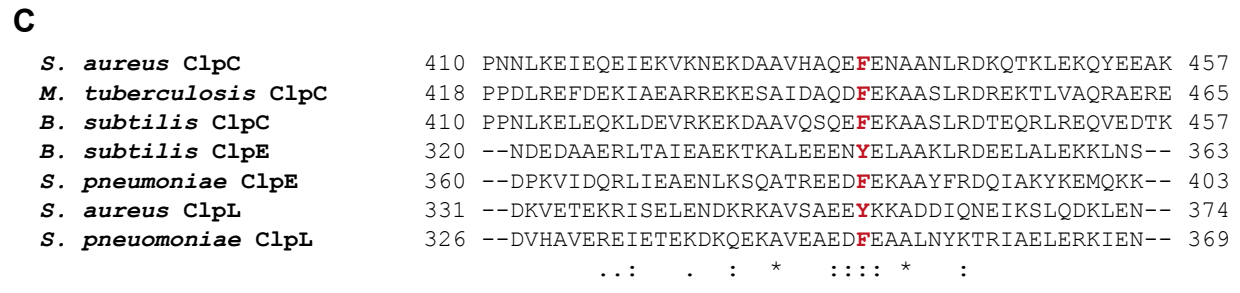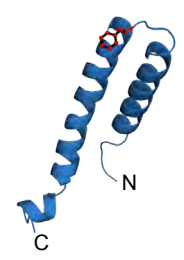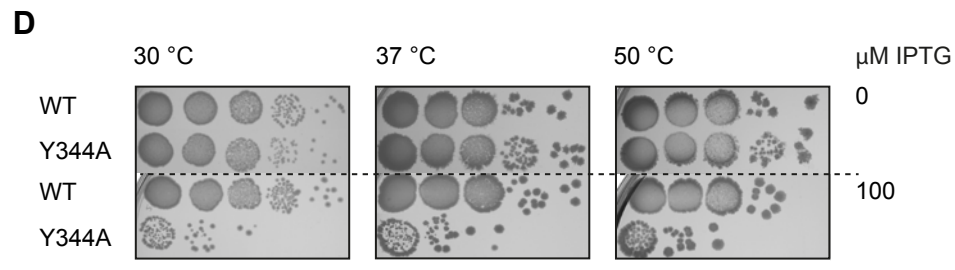

# Figure 7

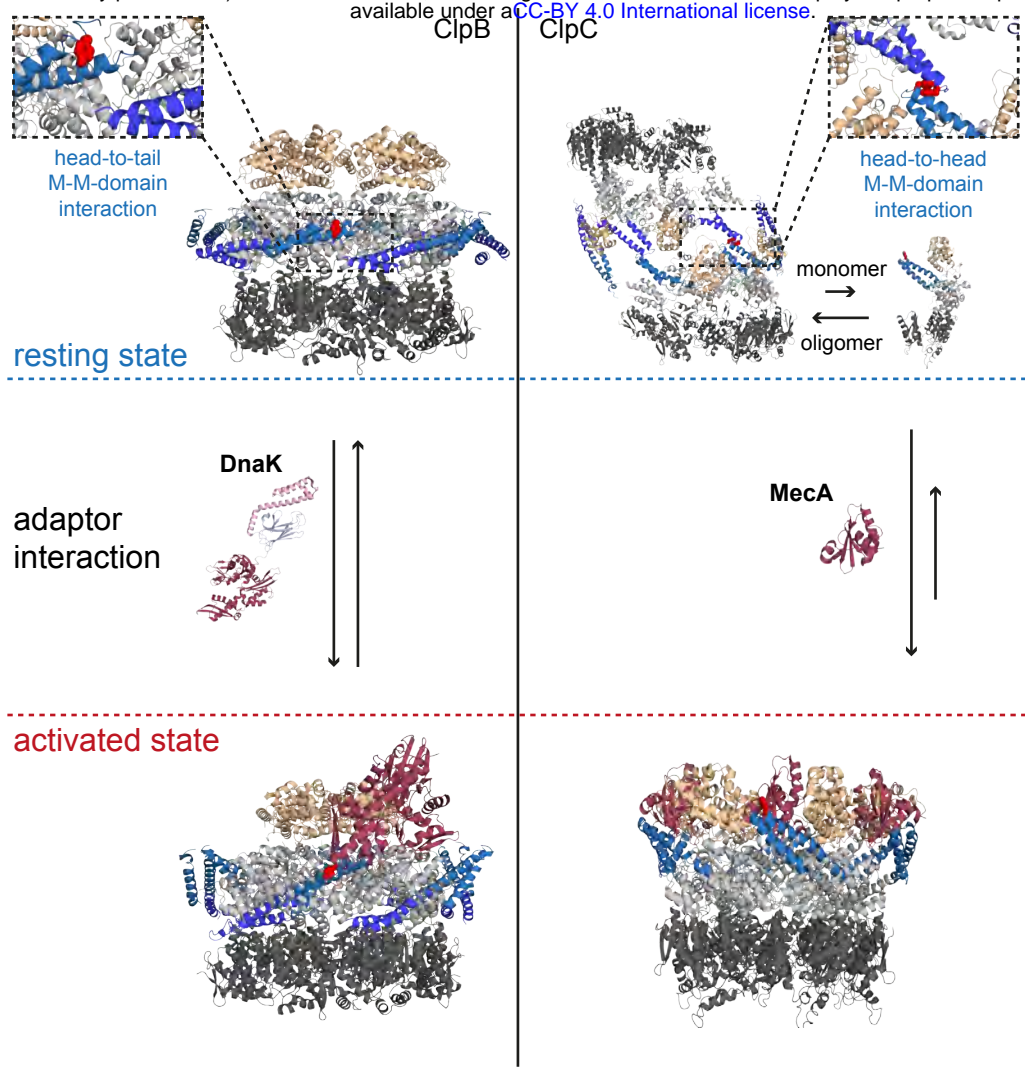

Source: https://www.biorxiv.org/content/10.1101/166256v1.full.pdf
